# Supplementary material for: A bio-inspired mononuclear manganese catalyst for high-rate electrochemical hydrogen production
Source: Royal Society of Chemistry journal article supplement (doi:10.1039/d1dt00672j), 2021-01-01
Supplement: d1dt00672j1.pdf [file d1dt00672j1.pdf]

*Supporting Information for*

## **A Bio-inspired Mononuclear Manganese Catalyst for Electrochemical Hydrogen Production with High Rate**

Jie Yang,<sup>#[a]</sup> Shuanglin He,<sup>#[a]</sup> Qianqian Wu,<sup>[a]</sup> Ping Zhang,<sup>[a]</sup> Lin Chen,<sup>\*[a]</sup> Fang Huang,<sup>\*[b]</sup> Fei Li<sup>\*[c]</sup>

[a] State Key Laboratory of Environment-Friendly Energy Material, School of Materials Science and Engineering, Southwest University of Science and Technology, Mianyang 621010, P. R. China.

[b] College of Chemistry, Chemical Engineering and Materials Science. Shandong Normal University, Jinan 250014, P. R. China.

[c] State Key Laboratory of Fine Chemicals, Dalian University of Technology, Dalian 116024, P. R. China.

[#] These authors contributed equally to this work

### **Corresponding Authors**

Email\*: [chenlin101101@aliyun.com](mailto:chenlin101101@aliyun.com),

[fanghuang@sdu.edu.cn](mailto:fanghuang@sdu.edu.cn)

[lifei@dlut.edu.cn](mailto:lifei@dlut.edu.cn)

## Contents

|                                                                                                                                                                                     |    |
|-------------------------------------------------------------------------------------------------------------------------------------------------------------------------------------|----|
| A Bio-inspired Mononuclear Manganese Catalyst for Electrochemical Hydrogen Production with High Rate .....                                                                          | 1  |
| 1. Scheme Contents .....                                                                                                                                                            | 3  |
| 2. Table Contents .....                                                                                                                                                             | 3  |
| 3. Figure Contents .....                                                                                                                                                            | 3  |
| 4. Crystallographic Structure Determinations .....                                                                                                                                  | 6  |
| 5. Electrochemistry Study Details .....                                                                                                                                             | 7  |
| 6. Determination of the Standard Potentials for the H <sub>2</sub> Evolution Half Reaction with anilinium tetrafluoroborate in CH <sub>3</sub> CN /DMF (5:1) Mixture Solution ..... | 9  |
| 7. Gas Analysis .....                                                                                                                                                               | 10 |
| 8. Determination of Faradaic Efficiency .....                                                                                                                                       | 10 |
| 9. Experiment Section .....                                                                                                                                                         | 11 |
| 10. <b><i>ν</i>CO</b> stretch absorption for complexes 1 and 2 .....                                                                                                                | 22 |
| 11. Tables of Crystallographic Data and Selected Bond Lengths and Angles.....                                                                                                       | 23 |
| 12. DFT Calculations .....                                                                                                                                                          | 44 |

## 1. Scheme Contents

|            |                                                                                                                                                                                                                             |    |
|------------|-----------------------------------------------------------------------------------------------------------------------------------------------------------------------------------------------------------------------------|----|
| Scheme S 1 | Preparation of target ligands <b>L1</b> .                                                                                                                                                                                   | 12 |
| Scheme S 2 | Preparation of target ligands <b>L2</b> .                                                                                                                                                                                   | 14 |
| Scheme S 3 | Preparation of target complex <b>1</b> .                                                                                                                                                                                    | 16 |
| Scheme S 4 | Preparation of target complex <b>2</b> .                                                                                                                                                                                    | 19 |
| Scheme S 5 | Computed reduction potentials (V vs. $\text{Fc}^{+/0}$ ) and free energies (kcal/mol) for the generation of active catalyst <b>1b</b> .                                                                                     | 46 |
| Scheme S 6 | Detail mechanism for hydrogen evolution reaction via <b>path 1</b> along with the calculated free energies relative to <b>1b</b> (in kcal/mol). The values labeled in green are electronic energies relative to <b>1b</b> . | 47 |
| Scheme S 7 | Detail mechanism for hydrogen evolution reaction via <b>path 2</b> along with the calculated free energies relative to <b>1b</b> (in kcal/mol). The values labeled in green are electronic energies relative to <b>1b</b> . | 48 |
| Scheme S 8 | Free energy profile for hydrogen evolution reaction via <b>path 2</b> . Computed reduction potentials and free energies are given in V vs. $\text{Fc}^{+/0}$ and kcal/mol.                                                  | 49 |

## 2. Table Contents

|           |                                                            |    |
|-----------|------------------------------------------------------------|----|
| Table S 1 | <b>Crystal data and structure refinement for complex 2</b> | 23 |
| Table S 2 | <b>Bond Lengths for complex 2</b>                          | 24 |
| Table S 3 | <b>Bond Angles for complex 2</b>                           | 25 |

## 3. Figure Contents

|            |                                                                                                                                                                          |    |
|------------|--------------------------------------------------------------------------------------------------------------------------------------------------------------------------|----|
| Figure S 1 | $^1\text{H}$ NMR spectrum of <b>L1</b> .                                                                                                                                 | 13 |
| Figure S 2 | $^1\text{H}$ NMR spectrum of <b>L2</b> .                                                                                                                                 | 15 |
| Figure S 3 | High resolution mass spectrum of complex <b>1</b> .                                                                                                                      | 17 |
| Figure S 4 | $^1\text{H}$ NMR spectrum of complex <b>1</b> .                                                                                                                          | 18 |
| Figure S 5 | High resolution mass spectrum of complex <b>2</b> .                                                                                                                      | 20 |
| Figure S 6 | $^1\text{H}$ NMR spectrum of complex <b>2</b> .                                                                                                                          | 21 |
| Figure S 7 | Experimental FTIR spectra of <b>1</b> and <b>2</b> recorded in KBr displaying characteristic $\nu_{\text{CO}}$ stretching modes for their facial tricarbonyl geometries. | 22 |

|                                                                                                                                                                                                                                                                                                                                                                                                                                                                                                                                                                                                                                                                                                                                                                                                                                                                                                                                                                                                                                                                                                                                          |    |
|------------------------------------------------------------------------------------------------------------------------------------------------------------------------------------------------------------------------------------------------------------------------------------------------------------------------------------------------------------------------------------------------------------------------------------------------------------------------------------------------------------------------------------------------------------------------------------------------------------------------------------------------------------------------------------------------------------------------------------------------------------------------------------------------------------------------------------------------------------------------------------------------------------------------------------------------------------------------------------------------------------------------------------------------------------------------------------------------------------------------------------------|----|
| Figure S 8 (a) IR-SEC of 3 mM <b>1</b> in MeCN/DMF (1:1) mixture with 0.1 M TBAPF <sub>6</sub> electrolyte under an atmosphere of Ar. The resting species (black, <b>1</b> ) has two $\nu_{CO}$ stretches at 2029 and 1935 cm <sup>-1</sup> . Upon initial reduction at approximately -1.45 V (blue), singly reduced species of <b>1</b> (2008, 1893, 1862 cm <sup>-1</sup> ) and doubly reduced species (1917 and 1814 cm <sup>-1</sup> ) formed. When the voltage of the cell is held at approximately -1.55 V for more than 1 min, all species are converted to doubly reduced species (orange). (b) IR-SEC of 3 mM <b>2</b> in MeCN/DMF (1:1) mixture with 0.1 M TBAPF <sub>6</sub> electrolyte under an atmosphere of Ar. The resting species (black, <b>2</b> ) has three $\nu_{CO}$ stretches at 2023, 1934 and 1922 cm <sup>-1</sup> . Upon initial reduction at approximately -1.45 V (blue), almost no singly reduced species formation. When the voltage of the cell is held at approximately -1.55 V for more than 1 min, all species are converted to doubly reduced species (1922 and 1821 cm <sup>-1</sup> , orange)..... | 26 |
| Figure S 9 (a) The CVs of complex <b>1</b> (0.5 mM) in <sup>n</sup> Bu <sub>4</sub> NPF <sub>6</sub> (0.1 M) CH <sub>3</sub> CN/DMF (5:1) solution with scan rate ( $\nu$ ) varied from 0.01 V/s to 20 V/s under Ar; (b) Plot of anodic and cathodic peak current ( $i_p$ ) vs. $\nu^{1/2}$ for <b>1</b> .....                                                                                                                                                                                                                                                                                                                                                                                                                                                                                                                                                                                                                                                                                                                                                                                                                           | 27 |
| Figure S 10 Cyclic voltammograms of 0.5 mM <b>1</b> with anilinium tetrafluoroborate (0 ~ 3 mM from bottom to top) under Ar. Condition: 3 mm glassy-carbon working electrode; 25°C; scan rate, 100 mV/s.; 0.1 M <sup>n</sup> Bu <sub>4</sub> NPF <sub>6</sub> as supporting electrolyte in CH <sub>3</sub> CN/DMF (5:1). .....                                                                                                                                                                                                                                                                                                                                                                                                                                                                                                                                                                                                                                                                                                                                                                                                           | 28 |
| Figure S 11 (a) Cyclic voltammograms of 0.02 M [PhNH <sub>3</sub> ] <sup>+</sup> [BF <sub>4</sub> ] <sup>-</sup> with varied concentrations of <b>1</b> (0 -0.05 mM) under Ar. (b) Plot of $i_{cat}$ versus concentrations of complex <b>1</b> . Voltammograms are taken at a scan rate of 100 mV/s, in CH <sub>3</sub> CN/DMF (5:1) with 0.1 M <sup>n</sup> Bu <sub>4</sub> NPF <sub>6</sub> .....                                                                                                                                                                                                                                                                                                                                                                                                                                                                                                                                                                                                                                                                                                                                      | 29 |
| Figure S 12 (a) Cyclic voltammograms of 0.02 M [PhNH <sub>3</sub> ] <sup>+</sup> [BF <sub>4</sub> ] <sup>-</sup> with varied concentrations of <b>1</b> (0.05 -0.5 mM) under Ar. (b) Plot of $i_{cat}$ versus concentrations of complex <b>1</b> . Voltammograms are taken at a scan rate of 100 mV/s, in CH <sub>3</sub> CN/DMF (5:1) with 0.1 M <sup>n</sup> Bu <sub>4</sub> NPF <sub>6</sub> .....                                                                                                                                                                                                                                                                                                                                                                                                                                                                                                                                                                                                                                                                                                                                    | 30 |
| Figure S 13 The CVs of complex <b>1</b> (0.5 mM) in the presence (blue) and absence (black) of 0.01 M [PhNH <sub>3</sub> ][BF <sub>4</sub> ]. CV of 0.01 M [PhNH <sub>3</sub> ][BF <sub>4</sub> in the absence of catalyst (red). Voltammograms are taken at a scan rate of 100 mV/s, in CH <sub>3</sub> CN/DMF (5:1) with 0.1 M <sup>n</sup> Bu <sub>4</sub> NPF <sub>6</sub> under Ar.....                                                                                                                                                                                                                                                                                                                                                                                                                                                                                                                                                                                                                                                                                                                                             | 31 |
| Figure S 14 (a) Cyclic voltammogram of 0.5 mM complexes <b>1</b> at varied scan rate from 10 mV/s to 250 mV/s in the presence of 0.2 M [PhNH <sub>3</sub> ] <sup>+</sup> [BF <sub>4</sub> ] <sup>-</sup> under Ar. (b) the dependence of catalytic peak currents on the scan rates. Voltammograms are taken in CH <sub>3</sub> CN/DMF (5:1) with 0.1 M <sup>n</sup> Bu <sub>4</sub> NPF <sub>6</sub> . .....                                                                                                                                                                                                                                                                                                                                                                                                                                                                                                                                                                                                                                                                                                                             | 32 |
| Figure S 15 (a) Cyclic voltammograms of 0.5 mM <b>1</b> in the absence and presence of 0.2 M [PhNH <sub>3</sub> ] <sup>+</sup> [BF <sub>4</sub> ] <sup>-</sup> under Ar at scan rate 100 mV/s with 0.1 M <sup>n</sup> Bu <sub>4</sub> NPF <sub>6</sub> in CH <sub>3</sub> CN/DMF (5:1). Inset: magnification of the CV of <b>1</b> . (b) Foot-of the-wave analyses of the voltammograms in (a). (c) Cyclic voltammograms of 0.5 mM <b>1</b> in the absence and presence of 0.2 M [PhNH <sub>3</sub> ] <sup>+</sup> [BF <sub>4</sub> ] <sup>-</sup> under the same condition as (a), Inset: magnification of the CV of <b>2</b> . (d) Foot-of the-wave analyses of the voltammograms in (c). .....                                                                                                                                                                                                                                                                                                                                                                                                                                        | 33 |
| Figure S 16 Controlled potential electrolysis at -1.5 V vs. Fc <sup>+0</sup> in the presence (red) of 0.25 mM <b>1</b> or <b>2</b> (blue) and in the absence of catalyst (black) under Ar. Conditions: 0.1 M <sup>n</sup> Bu <sub>4</sub> NPF <sub>6</sub> in CH <sub>3</sub> CN/DMF (5:1) with 0.2 M [PhNH <sub>3</sub> ] <sup>+</sup> [BF <sub>4</sub> ] <sup>-</sup> ; glassy carbon working                                                                                                                                                                                                                                                                                                                                                                                                                                                                                                                                                                                                                                                                                                                                          |    |

|                                                                                                                                                                                                                                                                                                                                                                                                                                                                                                                                                                  |    |
|------------------------------------------------------------------------------------------------------------------------------------------------------------------------------------------------------------------------------------------------------------------------------------------------------------------------------------------------------------------------------------------------------------------------------------------------------------------------------------------------------------------------------------------------------------------|----|
| electrode, graphite rod counter electrode, Ag <sup>+</sup> /Ag reference electrode. ....                                                                                                                                                                                                                                                                                                                                                                                                                                                                         | 35 |
| Figure S 17 Cyclic voltammograms of 0.25 mM <b>1</b> before (red line) and after (blue line) controlled potential electrolysis at -1.5 V vs. Fc <sup>+0</sup> in the presence of 0.2 M [PhNH <sub>3</sub> ] <sup>+</sup> [BF <sub>4</sub> ] <sup>-</sup> under Ar. Conditions: 0.1 M <sup>n</sup> Bu <sub>4</sub> NPF <sub>6</sub> in CH <sub>3</sub> CN/DMF (5:1) with 0.2 M [PhNH <sub>3</sub> ] <sup>+</sup> [BF <sub>4</sub> ] <sup>-</sup> , glassy carbon working electrode, graphite rod counter electrode, Ag <sup>+</sup> /Ag reference electrode. .... | 36 |
| Figure S 18 Ultraviolet-visible absorption spectra of 0.25 mM <b>1</b> before (red line) and after (blue line) controlled potential electrolysis at -1.5 V vs. Fc <sup>+0</sup> in the presence of 0.2 M [PhNH <sub>3</sub> ] <sup>+</sup> [BF <sub>4</sub> ] <sup>-</sup> under Ar. ....                                                                                                                                                                                                                                                                        | 37 |
| Figure S 19 (a) The CVs of complex <b>2</b> (0.5 mM) in <sup>n</sup> Bu <sub>4</sub> NPF <sub>6</sub> (0.1 M) CH <sub>3</sub> CN/DMF (5:1) solution with scan rate varied from 0.01 V/s to 10 V/s under Ar; (b) Plot of anodic peak current ( <i>i<sub>p</sub></i> ) vs. <i>v</i> <sup>1/2</sup> for <b>2</b> .....                                                                                                                                                                                                                                              | 38 |
| Figure S 20 (a) CVs of 0.5 mM <b>2</b> with anilinium tetrafluoroborate (0 ~ 0.01 M from bottom to top) under Ar. (b) Linear dependence of <i>i<sub>cat</sub></i> / <i>i<sub>p</sub></i> on the square root of acid concentration from 0.5 to 10 mM for <b>1</b> (red square) and <b>2</b> (black square). Condition: 3 mm glassy-carbon working electrode; 25°C; scan rate, 100 mV/s.; 0.1 M <sup>n</sup> Bu <sub>4</sub> NPF <sub>6</sub> as supporting electrolyte in CH <sub>3</sub> CN/DMF (5:1). ....                                                      | 39 |
| Figure S 21 (a) CVs of 0.5 mM <b>2</b> with anilinium tetrafluoroborate (0 ~ 0.2 M from bottom to top) under Ar. (b) linear dependence of <i>i<sub>cat</sub></i> / <i>i<sub>p</sub></i> on the square root of acid concentration from 0.01 to 0.2 M for <b>2</b> . Condition: 3 mm glassy-carbon working electrode; 25°C; scan rate, 100 mV/s.; 0.1 M <sup>n</sup> Bu <sub>4</sub> NPF <sub>6</sub> as supporting electrolyte in CH <sub>3</sub> CN/DMF (5:1). ....                                                                                              | 40 |
| Figure S 22 (a) Cyclic voltammograms of 0.02 M [PhNH <sub>3</sub> ] <sup>+</sup> [BF <sub>4</sub> ] <sup>-</sup> with varied concentrations of <b>2</b> (0 -0.1 mM) under Ar. (b) Plot of <i>i<sub>cat</sub></i> versus concentrations of complex <b>2</b> . Voltammograms are taken at a scan rate of 100 mV/s, in CH <sub>3</sub> CN/DMF (5:1) with 0.1 M <sup>n</sup> Bu <sub>4</sub> NPF <sub>6</sub> . ....                                                                                                                                                 | 41 |
| Figure S 23 (a) Cyclic voltammograms of 0.02 M [PhNH <sub>3</sub> ] <sup>+</sup> [BF <sub>4</sub> ] <sup>-</sup> with varied concentrations of <b>2</b> (0.05 -1 mM) under Ar. (b) Plot of <i>i<sub>cat</sub></i> versus concentrations of complex <b>2</b> . Voltammograms are taken at a scan rate of 100 mV/s, in CH <sub>3</sub> CN/DMF (5:1) with 0.1 M <sup>n</sup> Bu <sub>4</sub> NPF <sub>6</sub> . ....                                                                                                                                                | 42 |
| Figure S 24 Infrared spectra of complex <b>1</b> in the absence (black) and presence (red) of 10 equiv [PhNH <sub>3</sub> ] <sup>+</sup> [BF <sub>4</sub> ] <sup>-</sup> in MeCN. ....                                                                                                                                                                                                                                                                                                                                                                           | 43 |

#### 4. Crystallographic Structure Determinations

The single-crystal X-ray diffraction data were collected with an Bruker Smart Apex II CCD diffractometer with a graphite-monochromated Mo-K radiation ( $\lambda = 0.071073$  Å) at 196 K using the  $\omega - 2\theta$  scan mode. Data processing was accomplished with the SAINT processing program <sup>S1</sup>. Intensity data were corrected for absorption by the SADABS program <sup>S2</sup>. All structures were solved by direct methods and refined on  $F^2$  against full-matrix least-squares methods by using the SHELXTL 2014 program package <sup>S3</sup>. All non-hydrogen atoms were refined anisotropically. Hydrogen atoms were located by geometrical calculation. Crystallographic data and selected bond lengths and angles for **2** are listed below. CCDC-2036461 (**2**) contains the supplementary crystallographic data for this paper. These data can be obtained free of charge from The Cambridge Crystallographic Data Centre via [www.ccdc.cam.ac.uk/data\\_request/cif](http://www.ccdc.cam.ac.uk/data_request/cif).

S1 G. M. Sheldrick, SHELXTL97 Program for the Refinement of Crystal Structure, University of Göttingen, Germany, 1997.

S2 Software packages SMART and SAINT, Siemens Energy & Automation Inc., Madison, Wisconsin, 1996.

S3 G. M. Sheldrick, SADABS Absorption Correction Program, University of Göttingen, Germany, 1996.

## 5. Electrochemistry Study Details

**CV measurements in CH<sub>3</sub>CN.** Cyclic voltammetry experiments were carried out in a three-electrode cell under high-purity Ar using CHI 760E potentiostat. The working electrode was a glassy carbon disc (diameter 3 mm) polished with 0.5 mm diamond pastes, then sonicated in ion-free water for 15 min and washed with MeCN prior to use. The reference electrode was a Ag<sup>+</sup>/Ag electrode (0.01 M AgNO<sub>3</sub> in CH<sub>3</sub>CN) and the counter electrode was platinum wire. A solution of 0.1 M <sup>n</sup>Bu<sub>4</sub>NPF<sub>6</sub> (Fluka, electrochemical grade) in CH<sub>3</sub>CN/DMF (5:1, **All of the electrochemistry studies were performed in this mixture solution, owing to the poor solubility of complex 1 in pure CH<sub>3</sub>CN.**) was used as supporting electrolyte, which was degassed by bubbling with dry Ar for 5 min before measurement. The ferricinium/ferrocene (Fc<sup>+0</sup>) couple was used as an internal reference and *all potentials given in this work are referred to Fc<sup>+0</sup>.*

**Controlled potential electrolysis experiments (CPE).** Controlled potential electrolysis experiments were carried out in a custom 18 mL cell designed in our laboratory. The setup included a carbon plate working electrode, graphite rod counter electrode separated from the solution by a porous glass frit, and Ag/AgNO<sub>3</sub> pseudoreference electrode. For the catalytic electrolysis studies, the cell was charged with Mn catalyst (0.2 mM) and anilinium tetrafluoroborate (0.2 M) in 0.1 M tetra-*n*-butylammonium hexafluorophosphate solution CH<sub>3</sub>CN/DMF (5:1). Hydrogen evolution was quantified by analyzing 50 μL aliquots of the headspace on a Beifen 6890A Series gas chromatograph. The partial pressure of H<sub>2</sub> in the headspace was determined by comparison to gas standard samples. Henry's Law was used to calculate the total H<sub>2</sub> production, given as the sum of headspace and dissolved hydrogen.

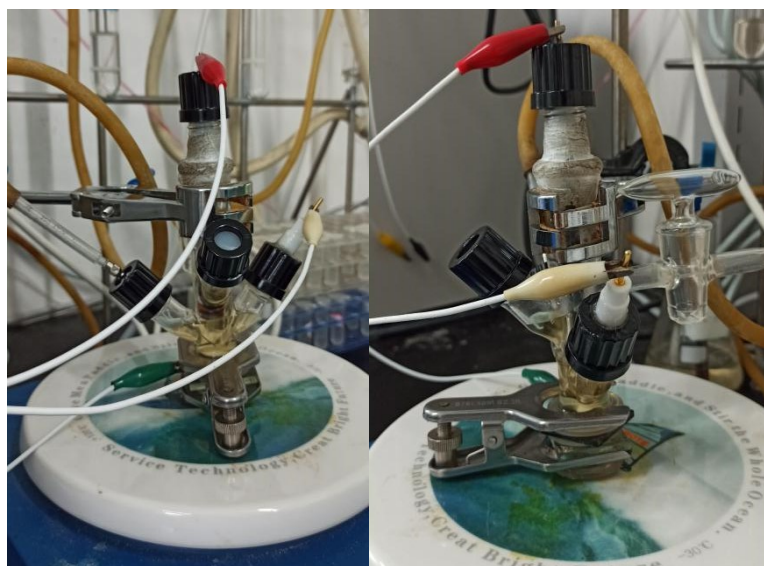

### **Typical Experimental Conditions:**

Purity of the electrolyte medium was confirmed over the available electrochemical window through background scans taken prior to addition of analyte. 1.03 mg (0.0016 mmol) of **1** and 0.288 g (160  $\mu$ mol) of anilinium tetrafluoroborate were weighed into an 18 mL glass vial and dissolved in 8 mL of a supporting electrolyte solution (0.1 M  $[\text{nBu}_4\text{N}][\text{PF}_6] / \text{CH}_3\text{CN}/\text{DMF}$  (5:1)).



## 6. Determination of the Standard Potentials for the H<sub>2</sub> Evolution Half Reaction with anilinium tetrafluoroborate in CH<sub>3</sub>CN /DMF (5:1) Mixture Solution

The standard potentials is roughly estimated by linear sweep voltammograms for 0.01 M anilinium tetrafluoroborate in pure CH<sub>3</sub>CN and CH<sub>3</sub>CN/DMF mixture (5:1) solution with **Pt working electrode** (Inorg. Chem. **2006**, 45, 9181-9184 ). As shown in below, the standard potentials the H<sub>2</sub> Evolution Half Reaction with anilinium tetrafluoroborate in pure CH<sub>3</sub>CN is  $-0.65$  V vs. Fc<sup>+0</sup> (Inorg. Chem. **2010**, 49, 10338–10347). The mixture solution CH<sub>3</sub>CN/DMF (5:1) results in the standard potentials cathodic shifting to  $-0.75$  V vs. Fc<sup>+0</sup>, about  $-0.1$  V versus that in pure CH<sub>3</sub>CN.

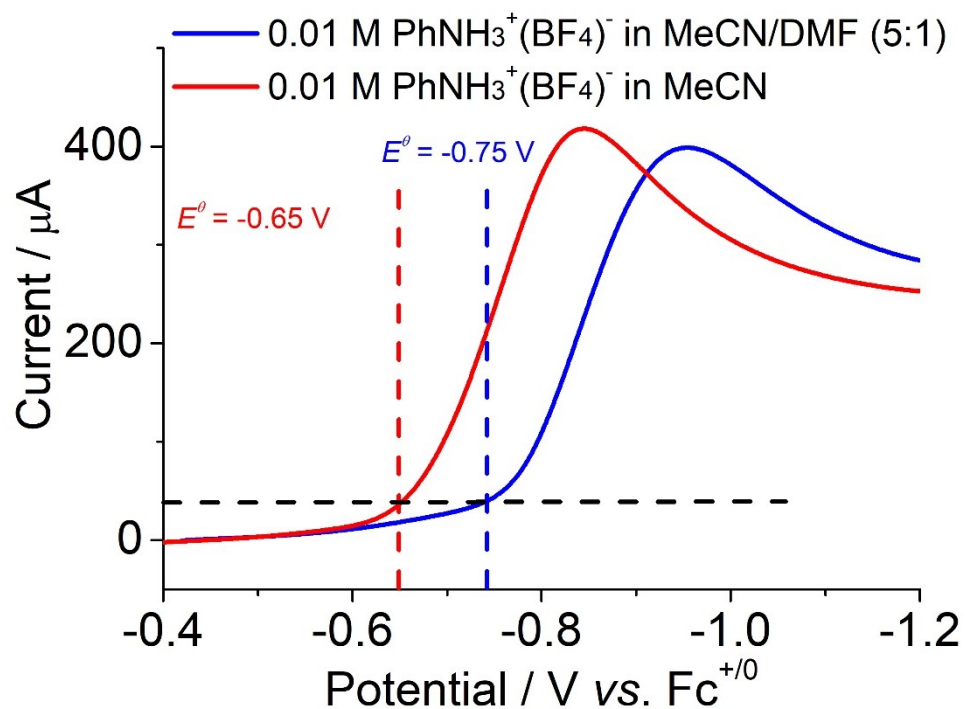

Condition: Pt wire working electrode, 25°C, scan rate, 100 mV/s, 0.1 M <sup>n</sup>Bu<sub>4</sub>NPF<sub>6</sub> as supporting electrolyte.

## 7. Gas Analysis

Gas analysis for bulk electrolysis experiments were performed using 50  $\mu\text{L}$  sample injections on a Beifen 6890A series gas chromatograph. Gas sample  $\text{H}_2$  was analyzed using thermal conductivity detector (TCD), stainless-steel column packed with molecular sieves (5  $\text{\AA}$   $\times$  3 m), and Ar as the carrier gas (flow rate = 30  $\text{mL min}^{-1}$ ). Gas chromatography calibration curves were made by sampling known volumes of  $\text{H}_2$  gas. The operating temperatures of the injection port, the oven/column, and detector were 50°C, 50°C and 180°C, respectively. Aliquots (50  $\mu\text{L}$ ) of the gas headspace were injected into the GC every time to analyze the gas products formed.

## 8. Determination of Faradaic Efficiency

Gas chromatographic analysis (Beifen 6890A) of the electrolysis-cell headspace was made following controlled potential electrolysis experiments. The amount of hydrogen generated was determined by the external standard method mentioned above.

### Calculation for Faradaic Efficiency.

$$\text{Faradaic yield product (\%)} = 100 \times n_{\text{prod}} / (Q / F / 2)$$

Where F is the Faraday constant ( $\text{C mol}^{-1}$ ),  $n_{\text{prod}}$  (mol) is the amount of  $\text{H}_2$  in the headspace determined by GC, and Q (C) is the charged passed during electrolysis (Fig. S15).

## 9. Experiment Section

### Materials and Instruments

All manipulations for preparation and handling of organometallic complexes were carried out under air. All the solvents were used as received. Other commercially available chemicals such as  $\text{Mn}(\text{CO})_5\text{Br}$ , 2-aminobenzaldehyde, 1-(6-bromopyridin-2-yl)ethanone, benzoyl chloride, 2-aminephenylboronic acid,  $\text{Pd}(\text{PPh}_3)_4$  were purchased from local suppliers and used as received. Water was deionized with the Millipore Milli-Q UF Plus system. Glass carbon disc (3 mm),  $\text{Ag}^+/\text{Ag}$  electrode and platinum wire were purchased from CHI for electrochemical studies.

NMR Spectra were collected with a varian INOVA 600 NMR spectrometer. Mass spectra were recorded with HP 1100 HPL/ESI-DAD-MS and Waters/Micromass LC/Q-TOF-MS instruments. Elemental analyses were performed with a Thermoquest-Flash EA 1112 elemental analyzer. Synthesis.

**Spectroelectrochemical experiments** were carried out using an Tensor 227 FTIR spectrometer (Bruker). A model CHI 760E potentiostat was used to control electrode potential. The SEC experiments were performed by using a purpose-designed three-neck cell in Ar saturated  $\text{CH}_3\text{CN}/\text{DMF}$  (5:1) mixed solution. The working electrode was a glassy carbon disk of 10 mm in diameter, the counter electrode was a platinum foil. The  $\text{Ag}^+/\text{Ag}$  reference electrode was put into the SEC cell, which contains the target complex and 0.1 M  $n\text{Bu}_4\text{NPF}_6$  in  $\text{CH}_3\text{CN}$ . The IR-SEC spectra were collected in single beam mode at  $4\text{ cm}^{-1}$ .

### 1) Preparation of L1.

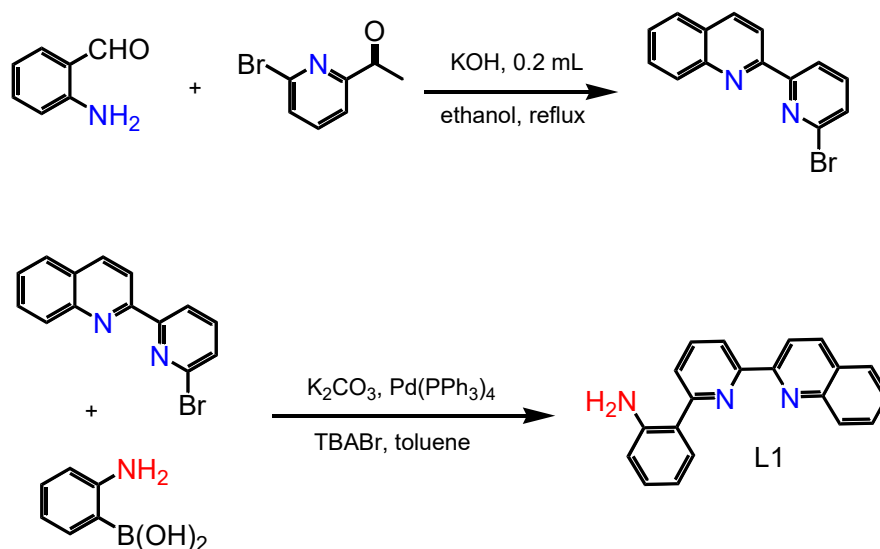

Scheme S 1 Preparation of target ligands L1.

a) Preparation of L1a. L1a was obtained according to literature procedures (Bera, J. K. *et. al. Inorg. Chem.*, **2006**, 45 (10), 4007–4015).

L1 was obtained according to literature procedures (Solan, G. A. *et. al. Organometallics* **2013**, 32, 249–259). The product L1 was obtained as a pale yellow solid (80%). <sup>1</sup>H NMR (600 MHz, DMSO) δ 8.57 (d, 1H), 8.49 (d, 1H), 8.45 (d, 1H), 8.15 (d, 1H), 8.10 (t, 1H), 8.06 (d, 1H), 7.90 (d, 1H), 7.84 (t, 1H), 7.67 (t, 1H), 7.62 (d, 1H), 7.16 (t, 1H), 6.85 (d, 1H), 6.69 (t, 1H), 6.57 (s, 2H). ESI-MS: Calcd for [M+H]<sup>+</sup>: *m/z* 298.16; found: 298.15.

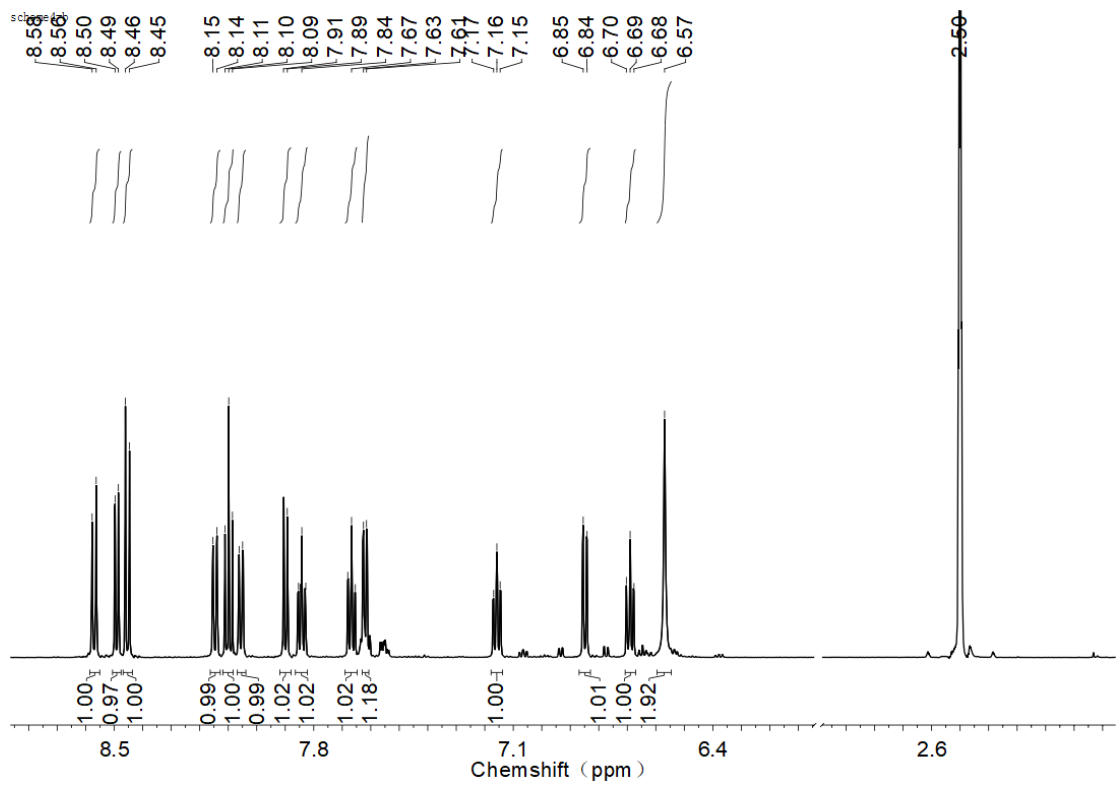

Figure S 1  $^1\text{H}$  NMR spectrum of L1.

## 2) Preparation of L2.

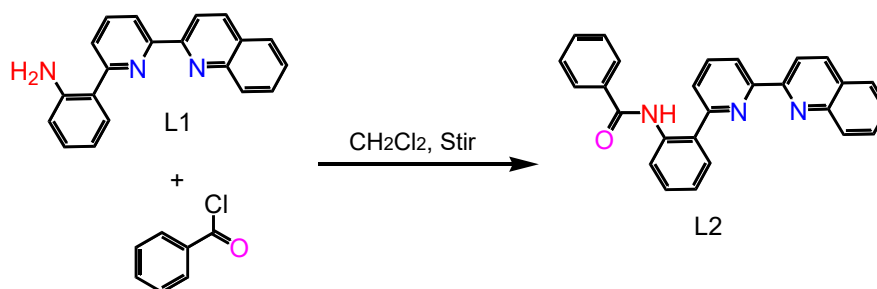

Scheme S 2 Preparation of target ligands **L2**.

Excess benzoyl chloride was slowly added to the 100 mL CH<sub>2</sub>Cl<sub>2</sub> solution of **L1** (5 mmol). The resulted mixture was stirred under room temperature for 1 hour followed by addition of excess triethylamine. After stirring for another 2 hours, the reaction was terminated by addition of 100 mL water. The organic layer was washed with water for three times and collected. Following drying with anhydrous sodium sulfate, the volatiles were removed under reduced pressure to give an orange-brown residue. The residues were purified using a short silica gel column employing dichloromethane/methanol ether (100/5) as eluting solvent. After the solvent was removed under reduced pressure, The product **L2** was obtained as a pale yellow solid (96%). <sup>1</sup>H NMR (600 MHz, DMSO) δ 11.78 (s, 1H), 8.54 (d, Hz, 1H), 8.45 (q, Hz, 2H), 8.29 (d, 1H), 8.20 (t, 1H), 8.16 (d, 1H), 8.08 (d, 1H), 7.99 (d, 1H), 7.90 (d, 1H), 7.86 (t, 1H), 7.70 (t, 3H), 7.56 (t, 2H), 7.38 (t, 1H), 7.26 (t, 1H), 6.98 (t, 2H). ESI-MS: Calcd for [M+H]<sup>+</sup>: *m/z* 402.16; found: 402.15.

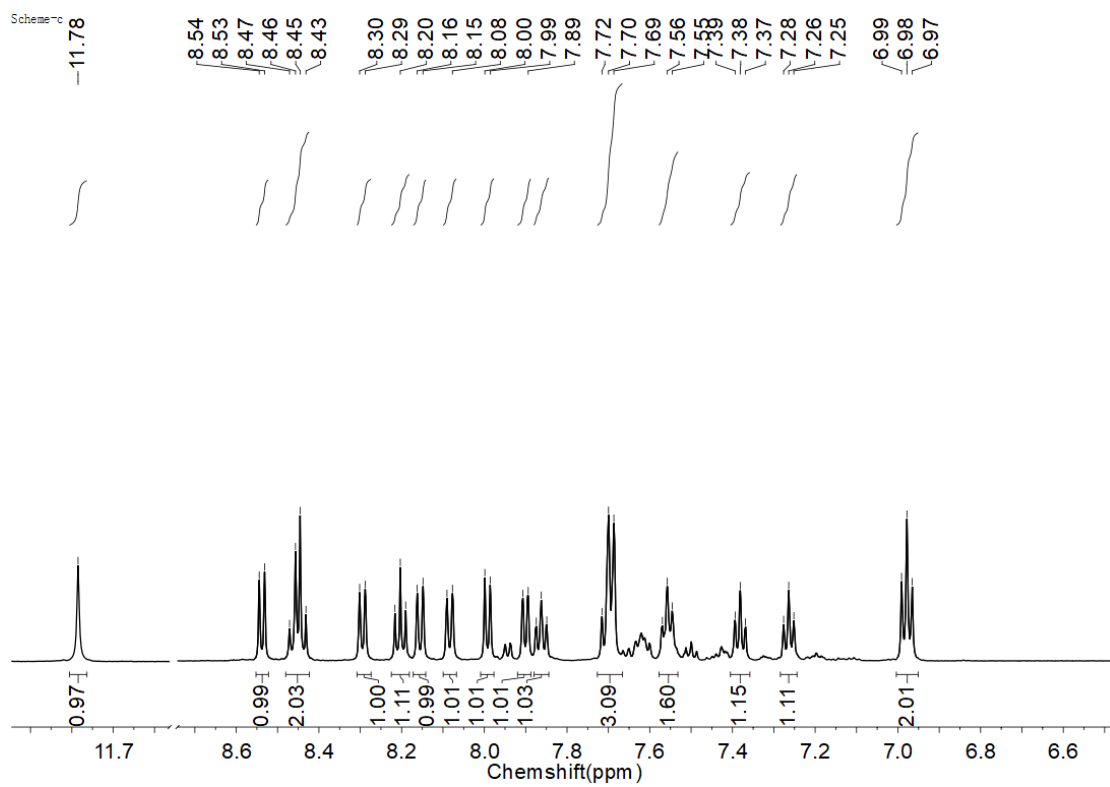

Figure S2  $^1\text{H}$  NMR spectrum of **L2**.

### 3) Preparation of $[\text{Mn}(\text{L}^1)(\text{CO})_3]\text{Br}$ (**1**).

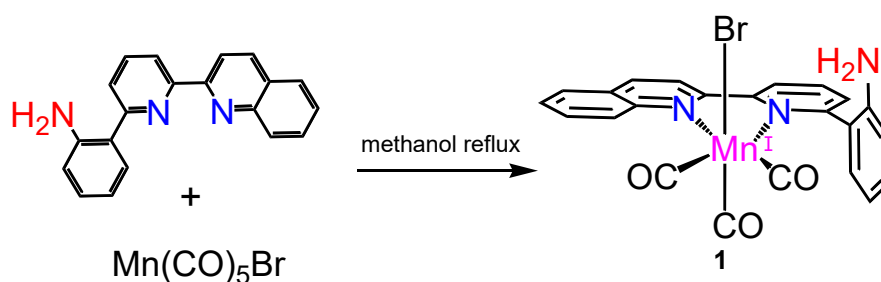

Scheme S 3 Preparation of target complex **1**.

$\text{Mn}(\text{CO})_5\text{Br}$  (100 mg, 0.36 mmol) was added to 5 mL methanol under argon atmosphere. Ligand **L1** (107 mg, 0.36 mmol) was added to the mixture and heated to reflux. The solution turned orange within 30 min, and the product precipitated out of solution. The mixture was cooled to room temperature, and the precipitate was filtered off and washed with methanol. The orange solid was dried overnight under vacuum. The yield of  $[\text{Mn}(\text{L}^1)(\text{CO})_3]\text{Br}$  (**1**) was 149 mg (81%). The following were observed for the mixture of atropisomers (aniline adduct parallel and antiparallel to the axial plane)  $^1\text{H}$  NMR (600 MHz, DMSO)  $\delta$  8.97 (d, 1H), 8.84 (d, 1 H), 8.73 (s, 1H), 8.56~8.44 (m, 1 H), 8.28 (d, 2H), 8.14~8.05 (m, 2H), 7.90~7.84 (m, 1H), 7.67~6.69 (m, 4H), 6.57 (s, ~6.46 (s, 2H). IR (KBr, Figure S7)  $\nu_{\text{CO}}$ : 2024 (s), 1926 (s), 1916 (s)  $\text{cm}^{-1}$ . Anal. Calcd for complex **1**,  $\text{C}_{23}\text{H}_{15}\text{MnN}_3\text{O}_3\text{Br}$ (%): C, 53.51; H, 2.93;; N, 8.14; found: C, 53.52; H, 2.94; N, 8.07; MS (TOF-ES):  $m/z = 436.0493$   $[\text{M}-\text{Br}]^+$ .



H2

2020081707 40 (0.792) AM2 (Ar,20000.0,556.28,0.00,LS 10)

1: TOF MS ES+  
2.66e5

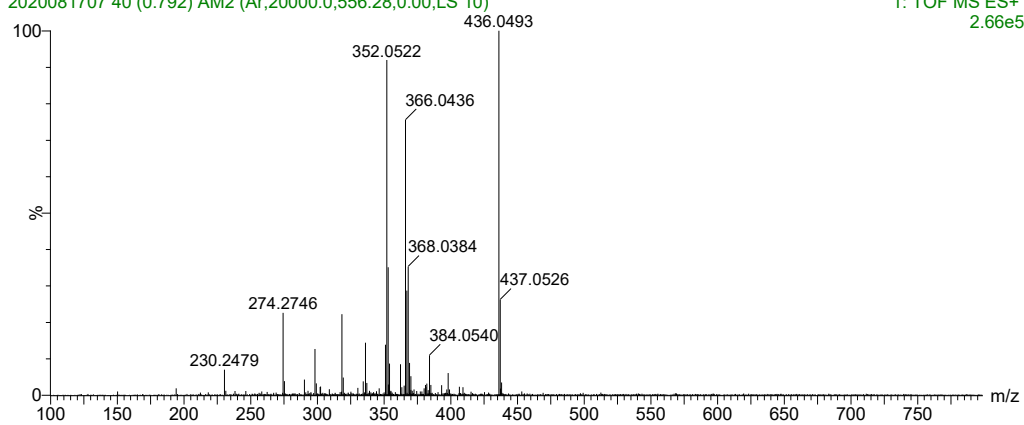

H2

2020081707 40 (0.792) AM2 (Ar,20000.0,556.28,0.00,LS 10)

1: TOF MS ES+  
2.66e5

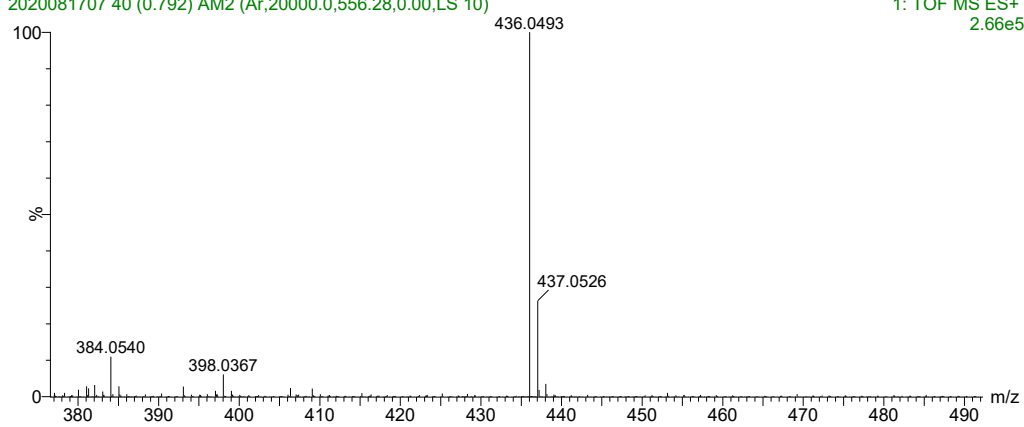

Figure S 3 High resolution mass spectrum of complex 1.

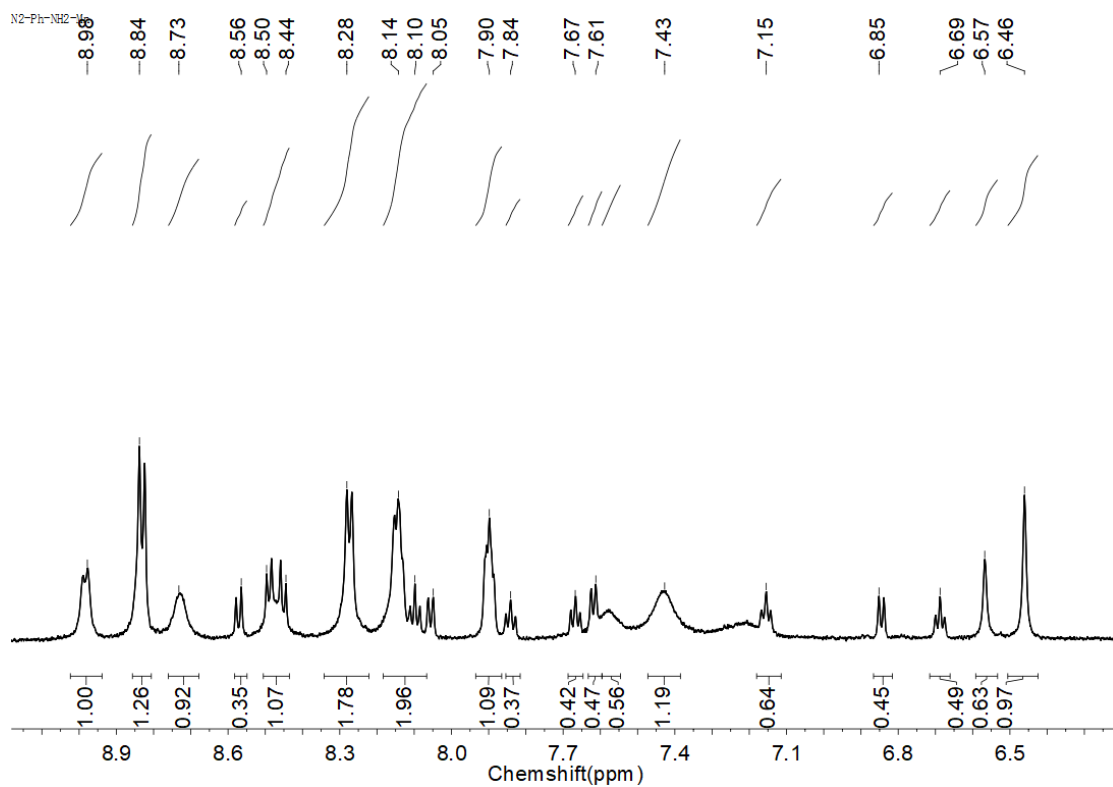

Figure S 4  $^1\text{H}$  NMR spectrum of complex **1**.

#### 4) Preparation of $[\text{Mn}(\text{L}2)(\text{CO})_3]\text{Br}$ (**2**).

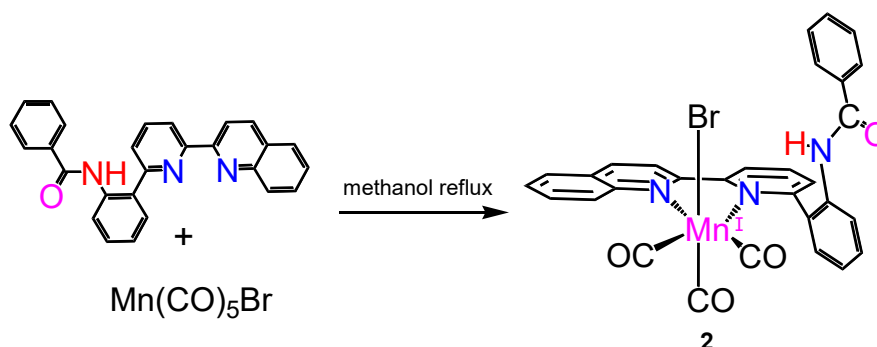

Scheme S 4 Preparation of target complex **2**.

$\text{Mn}(\text{CO})_5\text{Br}$  (100 mg, 0.36 mmol) was added to 5 mL methanol under argon atmosphere. Ligand **L2** (144 mg, 0.36 mmol) was added to the mixture and heated to reflux. The solution turned orange within 30 min, and the product precipitated out of solution. The mixture was cooled to room temperature, and the precipitate was filtered off and washed with methanol. The orange solid was dried overnight under vacuum. The yield of  $[\text{Mn}(\text{L}^2)(\text{CO})_3]\text{Br}$  (**2**) was 190 mg (85%). The following were observed for the mixture of atropisomers (the amide adduct parallel and antiparallel to the axial plane).  $^1\text{H}$  NMR (600 MHz, DMSO)  $\delta$  8.90~8.87 (m, 1H), 8.82~8.79 (m, 1H), 8.76~8.68 (m, 1H), 8.54~8.42 (m, 1H), 8.31~8.20 (m, 2H), 8.12~8.05 (m, 1H), 8.01~7.95 (m, 1H), 7.89~7.63 (m, 4H), 7.59~7.46 (m, 3H), 7.40~7.36 (m, 1H), 7.09~6.79 (m, 1H). IR (KBr, Figure S7)  $\nu_{\text{CO}}$ : 2020 (s), 1936 (s), 1897 (s), 1640 (s)  $\text{cm}^{-1}$ . Anal. Calcd for complex **2**,  $\text{C}_{30}\text{H}_{19}\text{BrMnN}_3\text{O}_4$ (%): C, 58.09; H, 3.09; N, 6.77; found: C, 58.10; H, 3.10; N, 6.74; MS (TOF-ES):  $m/z = 540.0753$   $[\text{M}-\text{Br}]^+$ ;  $m/z = 456.0895$   $[\text{M}-\text{Br}-3\text{CO}]^+$ ;

H3

2020081708 10 (0.225) AM2 (Ar,20000.0,556.28,0.00,LS 10); Cm (10:11)

1: TOF MS ES+  
1.24e6

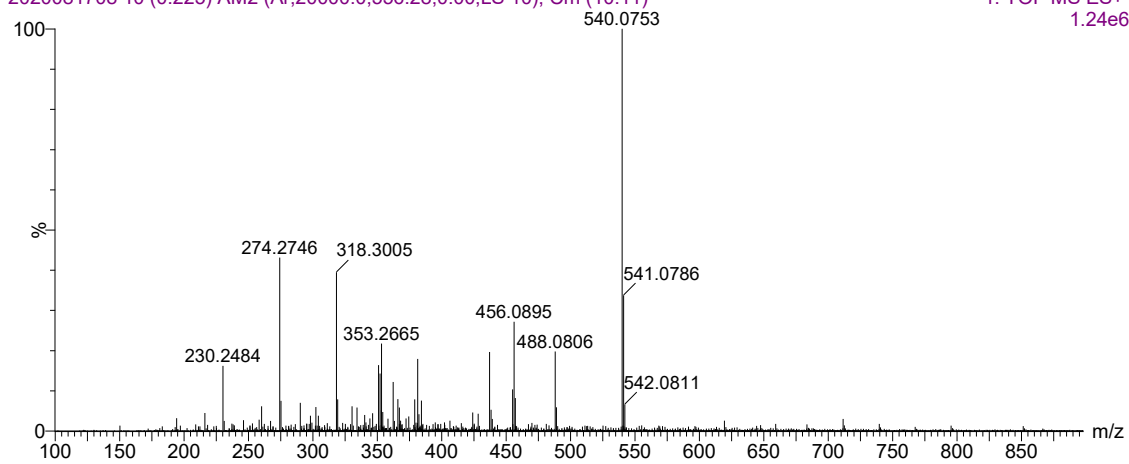

H3

2020081708 10 (0.225) AM2 (Ar,20000.0,556.28,0.00,LS 10); Cm (10:11)

1: TOF MS ES+  
1.24e6

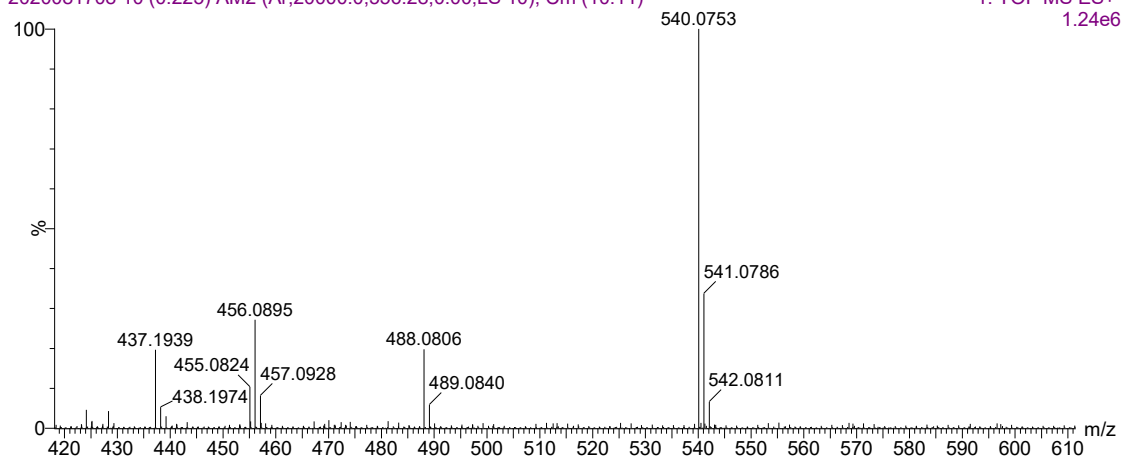

Figure S 5 High resolution mass spectrum of complex 2.

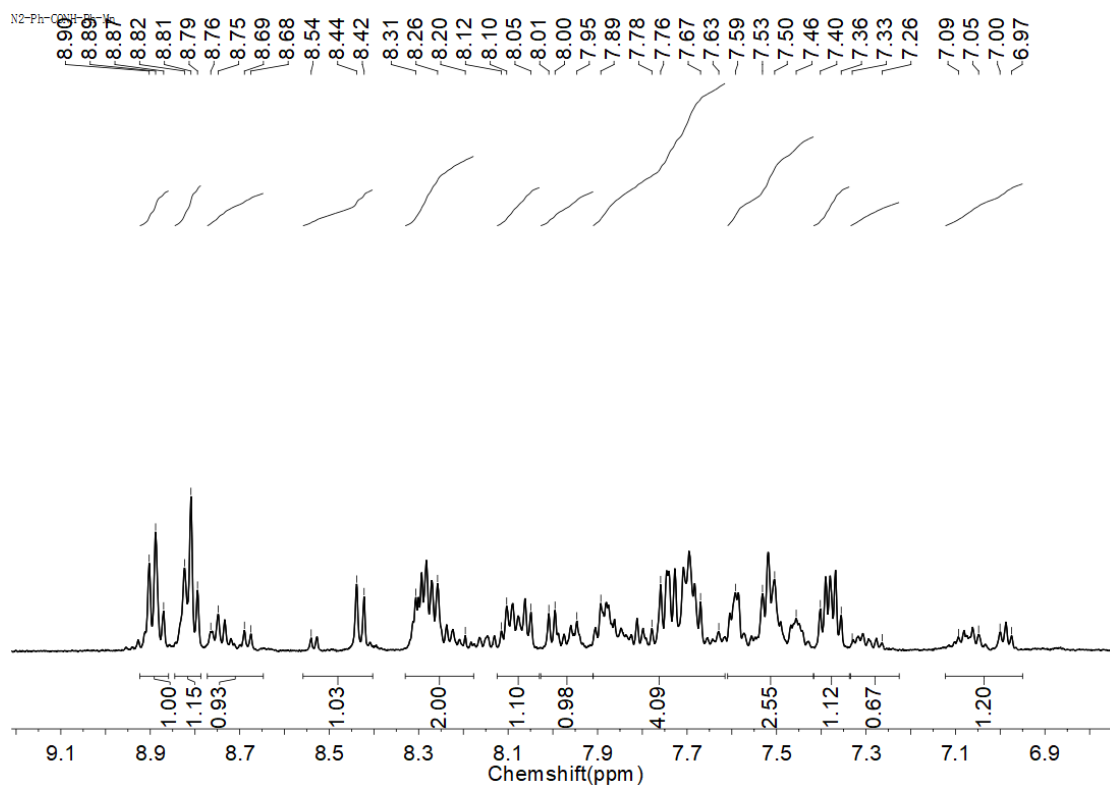

Figure S 6 <sup>1</sup>H NMR spectrum of complex **2**.

10.  $\nu_{CO}$  stretch absorption for complexes 1 and 2

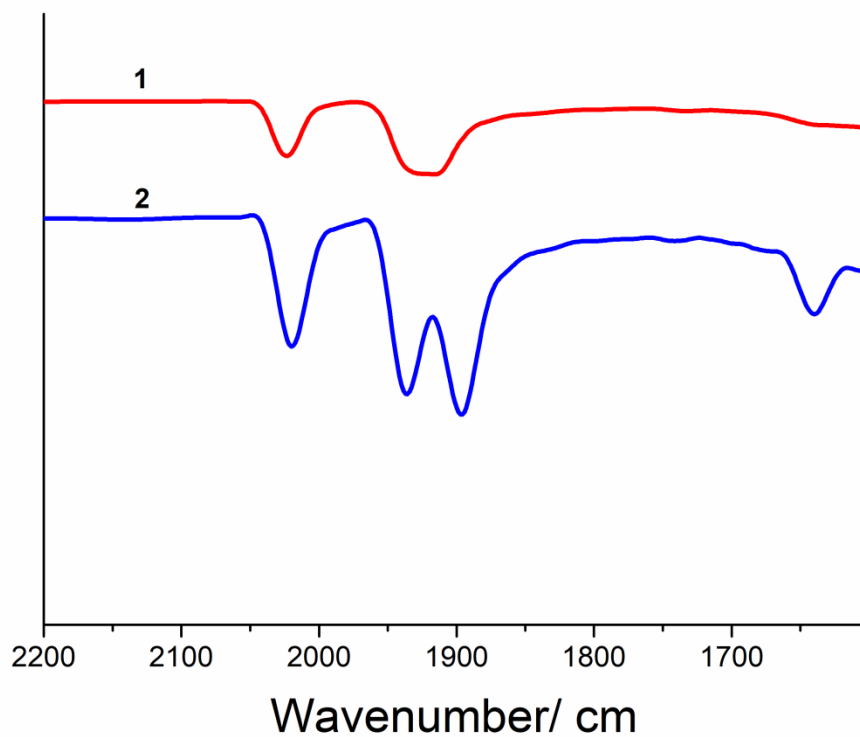

Figure S 7 Experimental FTIR spectra of **1** and **2** recorded in KBr displaying characteristic  $\nu_{CO}$  stretching modes for their facial tricarbonyl geometries.

## 11. Tables of Crystallographic Data and Selected Bond Lengths and Angles

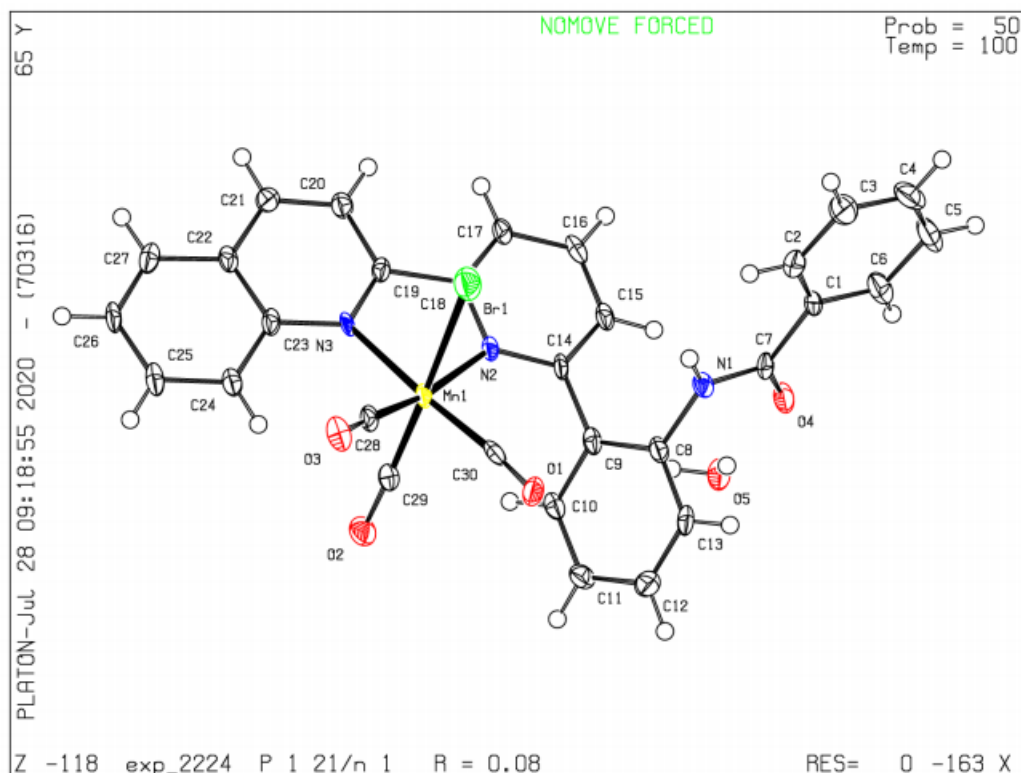

Table S 1 Crystal data and structure refinement for complex 2

|                                    |                                                                   |
|------------------------------------|-------------------------------------------------------------------|
| Identification code                | Complex 2                                                         |
| Empirical formula                  | C <sub>30</sub> H <sub>21</sub> BrMnN <sub>3</sub> O <sub>5</sub> |
| Formula weight                     | 638.35                                                            |
| Temperature/K                      | 99.99(10)                                                         |
| Crystal system                     | monoclinic                                                        |
| Space group                        | P2 <sub>1</sub> /n                                                |
| a/Å                                | 7.1335(3)                                                         |
| b/Å                                | 27.4408(10)                                                       |
| c/Å                                | 13.4270(6)                                                        |
| α/°                                | 90                                                                |
| β/°                                | 91.758(4)                                                         |
| γ/°                                | 90                                                                |
| Volume/Å <sup>3</sup>              | 2627.08(19)                                                       |
| Z                                  | 4                                                                 |
| ρ <sub>calc</sub> /cm <sup>3</sup> | 1.614                                                             |
| μ/mm <sup>-1</sup>                 | 6.265                                                             |
| F(000)                             | 1288.0                                                            |
| Crystal size/mm <sup>3</sup>       | 0.13 × 0.12 × 0.1                                                 |
| Radiation                          | Cu Kα (λ = 1.54184)                                               |

|                                                  |                                                                      |
|--------------------------------------------------|----------------------------------------------------------------------|
| 2 $\Theta$ range for data collection/ $^{\circ}$ | 6.442 to 147.082                                                     |
| Index ranges                                     | -8 $\leq$ h $\leq$ 8, -33 $\leq$ k $\leq$ 29, -16 $\leq$ l $\leq$ 16 |
| Reflections collected                            | 9917                                                                 |
| Independent reflections                          | 5137 [R <sub>int</sub> = 0.0655, R <sub>sigma</sub> = 0.0920]        |
| Data/restraints/parameters                       | 5137/0/364                                                           |
| Goodness-of-fit on F <sup>2</sup>                | 1.062                                                                |
| Final R indexes [I $\geq$ 2 $\sigma$ (I)]        | R <sub>1</sub> = 0.0825, wR <sub>2</sub> = 0.2187                    |
| Final R indexes [all data]                       | R <sub>1</sub> = 0.1030, wR <sub>2</sub> = 0.2433                    |
| Largest diff. peak/hole / e $\text{Å}^{-3}$      | 1.97/-1.51                                                           |

Table S 2 **Bond Lengths for complex 2**

| Atom | Atom | Length/ $\text{Å}$ | Atom | Atom | Length/ $\text{Å}$ |
|------|------|--------------------|------|------|--------------------|
| Br1  | Mn1  | 2.4995(12)         | C5   | C6   | 1.393(10)          |
| Mn1  | N2   | 2.098(5)           | C8   | C9   | 1.388(9)           |
| Mn1  | N3   | 2.083(5)           | C8   | C13  | 1.379(10)          |
| Mn1  | C28  | 1.801(7)           | C9   | C10  | 1.398(9)           |
| Mn1  | C29  | 1.788(7)           | C9   | C14  | 1.483(9)           |
| Mn1  | C30  | 1.826(7)           | C10  | C11  | 1.375(10)          |
| O1   | C30  | 1.148(8)           | C11  | C12  | 1.398(10)          |
| O2   | C29  | 1.152(8)           | C12  | C13  | 1.371(10)          |
| O3   | C28  | 1.138(8)           | C14  | C15  | 1.410(9)           |
| O4   | C7   | 1.239(8)           | C15  | C16  | 1.365(10)          |
| N1   | C7   | 1.347(8)           | C16  | C17  | 1.403(9)           |
| N1   | C8   | 1.457(8)           | C17  | C18  | 1.376(9)           |
| N2   | C14  | 1.345(8)           | C18  | C19  | 1.481(8)           |
| N2   | C18  | 1.360(8)           | C19  | C20  | 1.415(9)           |
| N3   | C19  | 1.328(8)           | C20  | C21  | 1.344(9)           |
| N3   | C23  | 1.370(8)           | C21  | C22  | 1.420(9)           |
| C1   | C2   | 1.387(10)          | C22  | C23  | 1.431(9)           |
| C1   | C6   | 1.386(10)          | C22  | C27  | 1.418(9)           |
| C1   | C7   | 1.510(9)           | C23  | C24  | 1.407(9)           |
| C2   | C3   | 1.383(10)          | C24  | C25  | 1.382(9)           |
| C3   | C4   | 1.359(11)          | C25  | C26  | 1.391(10)          |
| C4   | C5   | 1.373(12)          | C26  | C27  | 1.371(10)          |



Table S 3 **Bond Angles for complex 2**

| Atom | Atom | Atom | Angle/°   | Atom | Atom | Atom | Angle/°  |
|------|------|------|-----------|------|------|------|----------|
| N2   | Mn1  | Br1  | 83.35(14) | C13  | C8   | C9   | 120.9(6) |
| N3   | Mn1  | Br1  | 87.27(14) | C8   | C9   | C10  | 118.0(6) |
| N3   | Mn1  | N2   | 78.5(2)   | C8   | C9   | C14  | 123.3(6) |
| C28  | Mn1  | Br1  | 85.7(2)   | C10  | C9   | C14  | 118.6(6) |
| C28  | Mn1  | N2   | 168.8(2)  | C11  | C10  | C9   | 121.1(6) |
| C28  | Mn1  | N3   | 98.4(3)   | C10  | C11  | C12  | 119.8(6) |
| C28  | Mn1  | C30  | 82.9(3)   | C13  | C12  | C11  | 119.3(6) |
| C29  | Mn1  | Br1  | 176.3(2)  | C12  | C13  | C8   | 120.7(7) |
| C29  | Mn1  | N2   | 100.3(2)  | N2   | C14  | C9   | 120.0(6) |
| C29  | Mn1  | N3   | 93.2(3)   | N2   | C14  | C15  | 120.5(6) |
| C29  | Mn1  | C28  | 90.6(3)   | C15  | C14  | C9   | 119.4(6) |
| C29  | Mn1  | C30  | 90.4(3)   | C16  | C15  | C14  | 120.7(6) |
| C30  | Mn1  | Br1  | 89.2(2)   | C15  | C16  | C17  | 118.2(6) |
| C30  | Mn1  | N2   | 99.5(2)   | C18  | C17  | C16  | 119.2(6) |
| C30  | Mn1  | N3   | 176.2(2)  | N2   | C18  | C17  | 122.4(6) |
| C7   | N1   | C8   | 120.2(5)  | N2   | C18  | C19  | 115.1(5) |
| C14  | N2   | Mn1  | 128.0(4)  | C17  | C18  | C19  | 122.4(6) |
| C14  | N2   | C18  | 119.0(5)  | N3   | C19  | C18  | 116.2(5) |
| C18  | N2   | Mn1  | 111.1(4)  | N3   | C19  | C20  | 122.4(6) |
| C19  | N3   | Mn1  | 112.4(4)  | C20  | C19  | C18  | 121.3(6) |
| C19  | N3   | C23  | 119.0(6)  | C21  | C20  | C19  | 119.9(6) |
| C23  | N3   | Mn1  | 128.0(4)  | C20  | C21  | C22  | 119.7(6) |
| C2   | C1   | C6   | 119.8(7)  | C21  | C22  | C23  | 117.8(6) |
| C2   | C1   | C7   | 123.4(6)  | C27  | C22  | C21  | 122.4(6) |
| C6   | C1   | C7   | 116.7(6)  | C27  | C22  | C23  | 119.8(6) |
| C3   | C2   | C1   | 119.0(7)  | N3   | C23  | C22  | 120.9(6) |
| C4   | C3   | C2   | 120.9(7)  | N3   | C23  | C24  | 121.1(6) |
| C3   | C4   | C5   | 121.1(7)  | C24  | C23  | C22  | 118.0(6) |
| C4   | C5   | C6   | 118.7(7)  | C25  | C24  | C23  | 120.4(7) |
| C1   | C6   | C5   | 120.4(7)  | C24  | C25  | C26  | 121.6(7) |
| O4   | C7   | N1   | 122.1(6)  | C27  | C26  | C25  | 119.7(6) |
| O4   | C7   | C1   | 120.7(6)  | C26  | C27  | C22  | 120.4(6) |
| N1   | C7   | C1   | 117.2(6)  | O3   | C28  | Mn1  | 175.6(6) |
| C9   | C8   | N1   | 121.2(6)  | O2   | C29  | Mn1  | 174.0(6) |
| C13  | C8   | N1   | 117.9(6)  | O1   | C30  | Mn1  | 172.5(6) |

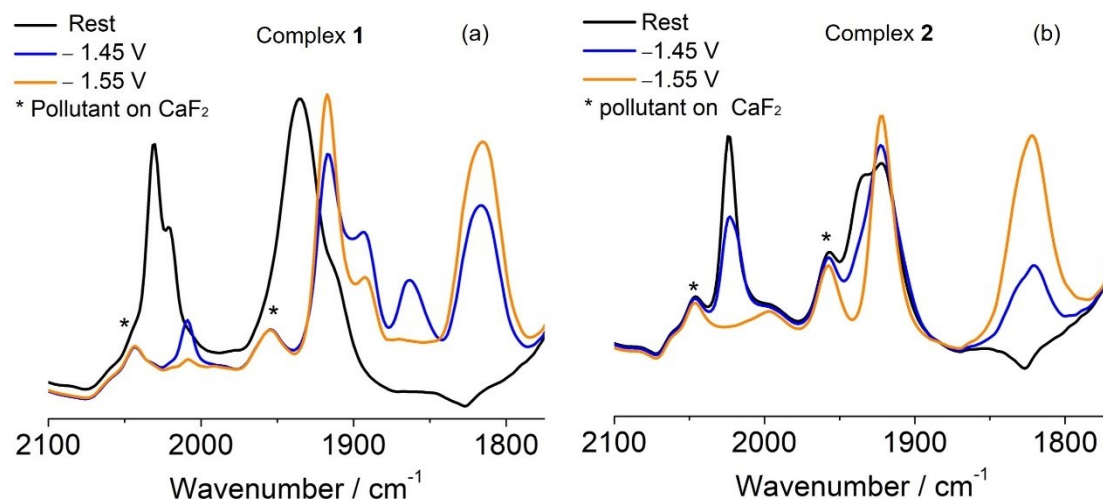

Figure S 8 (a) IR-SEC of 3 mM **1** in MeCN/DMF (1:1) mixture with 0.1 M TBAPF<sub>6</sub> electrolyte under an atmosphere of Ar. The resting species (black, **1**) has two  $\nu_{CO}$  stretches at 2029 and 1935  $\text{cm}^{-1}$ . Upon initial reduction at approximately  $-1.45$  V (blue), singly reduced species of **1** (2008, 1893, 1862  $\text{cm}^{-1}$ ) and doubly reduced species (1917 and 1814  $\text{cm}^{-1}$ ) formed. When the voltage of the cell is held at approximately  $-1.55$  V for more than 1 min, all species are converted to doubly reduced species (orange). (b) IR-SEC of 3 mM **2** in MeCN/DMF (1:1) mixture with 0.1 M TBAPF<sub>6</sub> electrolyte under an atmosphere of Ar. The resting species (black, **2**) has three  $\nu_{CO}$  stretches at 2023, 1934 and 1922  $\text{cm}^{-1}$ . Upon initial reduction at approximately  $-1.45$  V (blue), almost no singly reduced species formation. When the voltage of the cell is held at approximately  $-1.55$  V for more than 1 min, all species are converted to doubly reduced species (1922 and 1821  $\text{cm}^{-1}$ , orange).

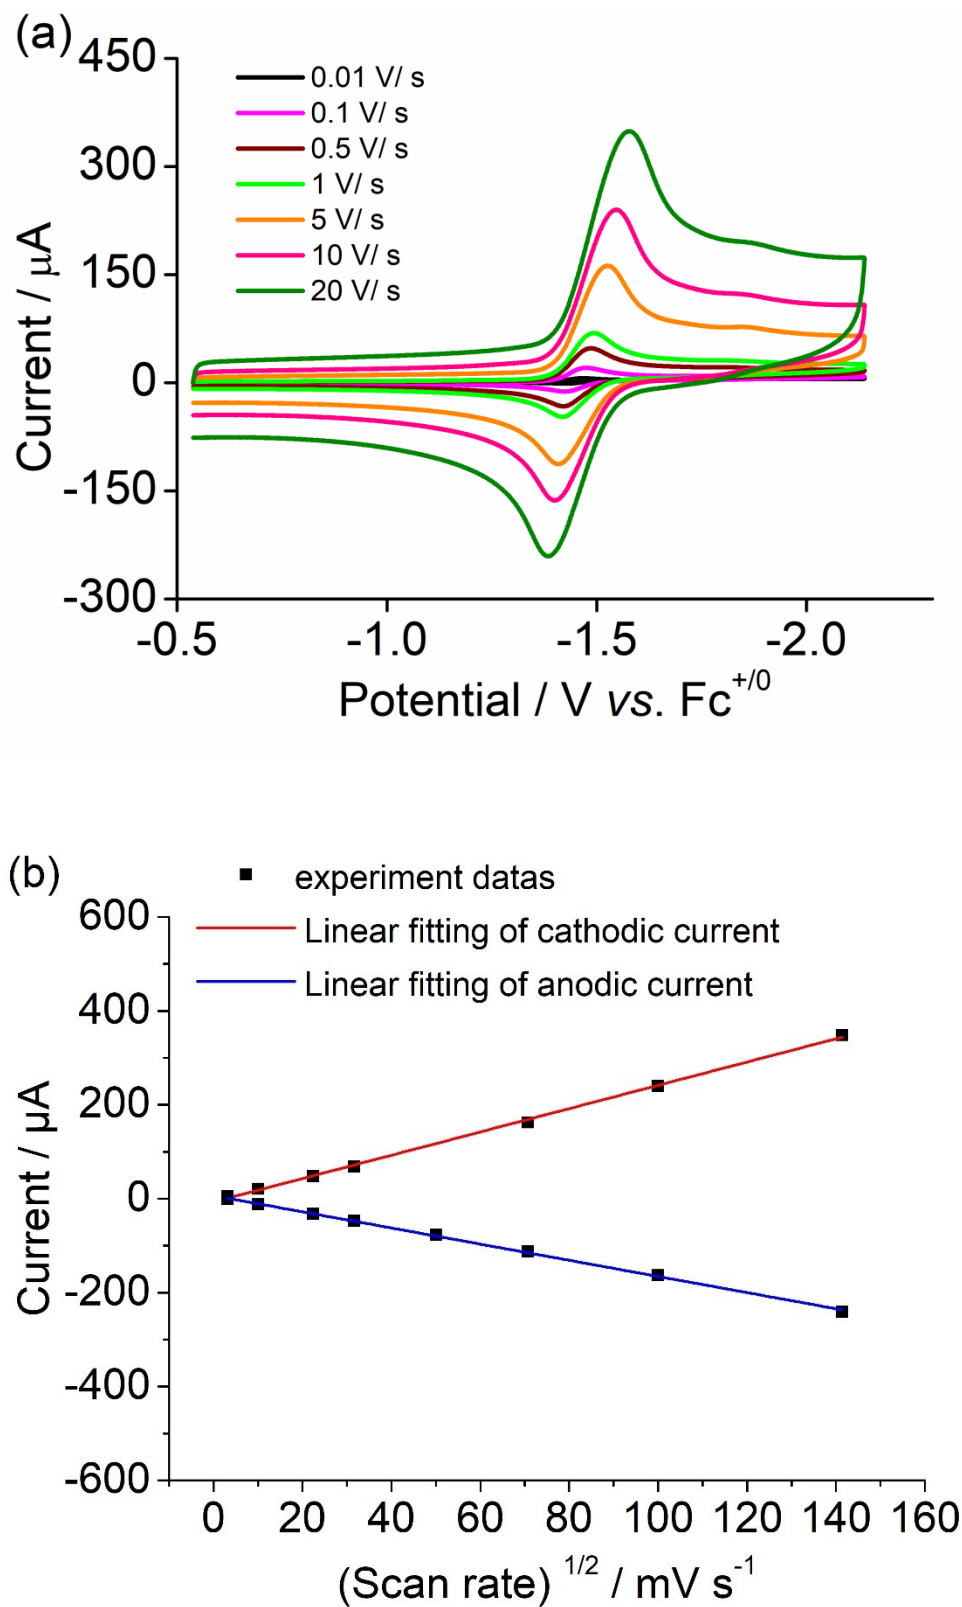

Figure S 9 (a) The CVs of complex **1** (0.5 mM) in  $n\text{-Bu}_4\text{NPF}_6$  (0.1 M)  $\text{CH}_3\text{CN}/\text{DMF}$  (5:1) solution with scan rate ( $\nu$ ) varied from 0.01 V/s to 20 V/s under Ar; (b) Plot of anodic and cathodic peak current ( $i_p$ ) vs.  $\nu^{1/2}$  for **1**.

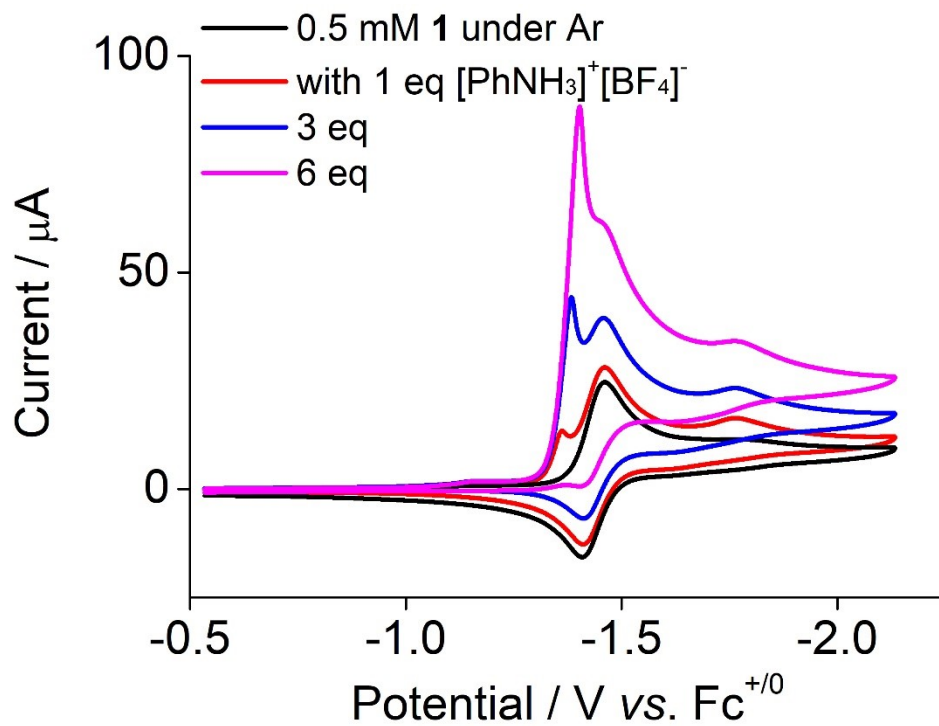

Figure S 10 Cyclic voltammograms of 0.5 mM **1** with anilinium tetrafluoroborate (0 ~ 3 mM from bottom to top) under Ar. Condition: 3 mm glassy-carbon working electrode; 25°C; scan rate, 100 mV/s.; 0.1 M <sup>n</sup>Bu<sub>4</sub>NPF<sub>6</sub> as supporting electrolyte in CH<sub>3</sub>CN/DMF (5:1).

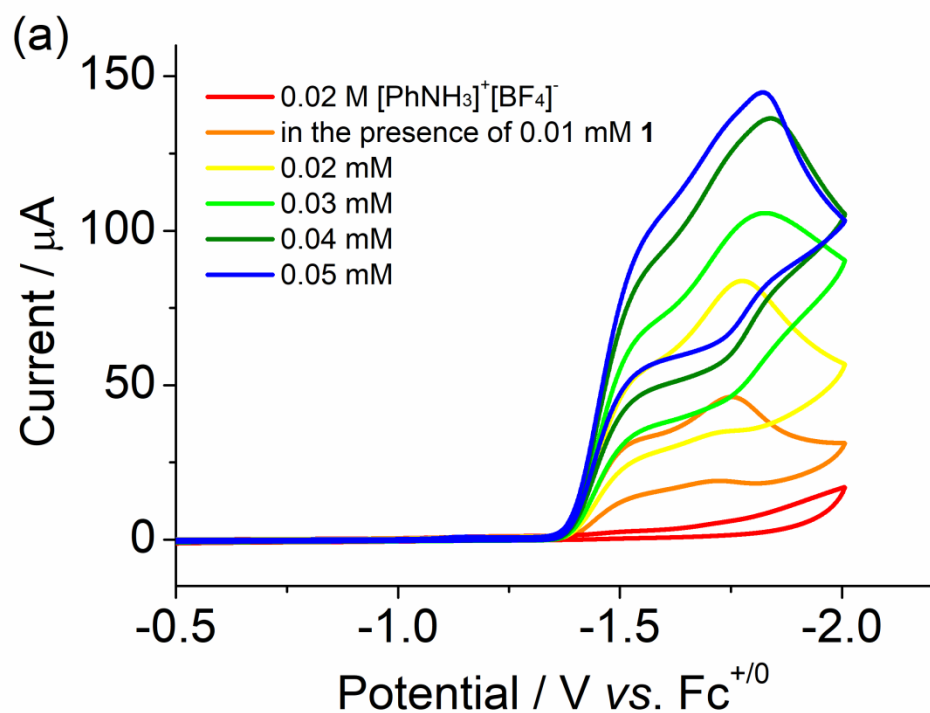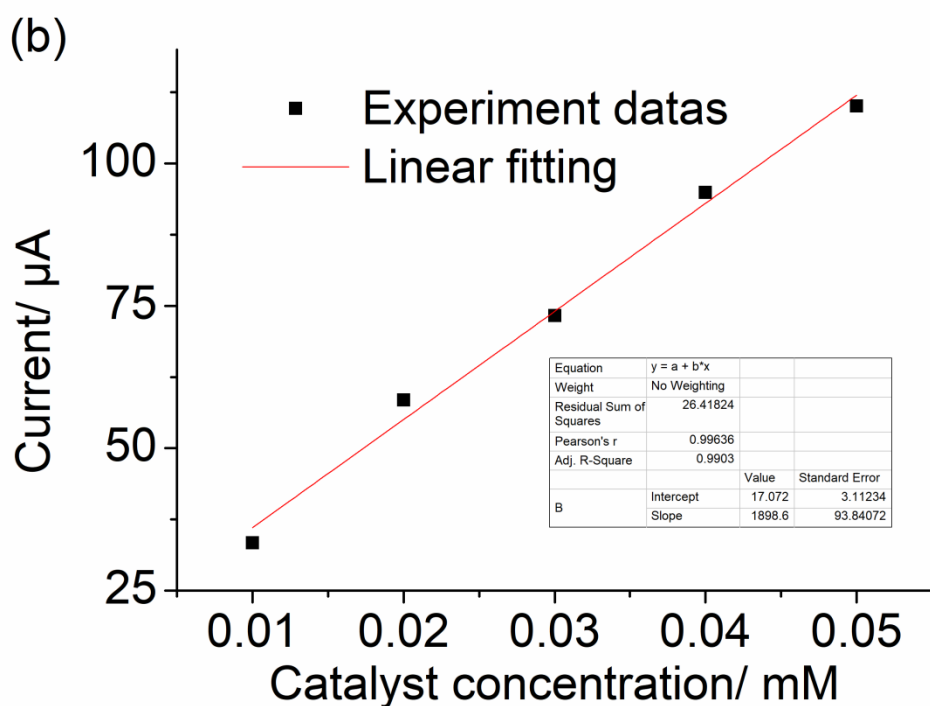

Figure S 11 (a) Cyclic voltammograms of 0.02 M  $[\text{PhNH}_3]^+[\text{BF}_4]^-$  with varied concentrations of **1** (0–0.05 mM) under Ar. (b) Plot of  $i_{\text{cat}}$  versus concentrations of complex **1**. Voltammograms are taken at a scan rate of 100 mV/s, in  $\text{CH}_3\text{CN}/\text{DMF}$  (5:1) with 0.1 M  $n\text{Bu}_4\text{NPF}_6$ .

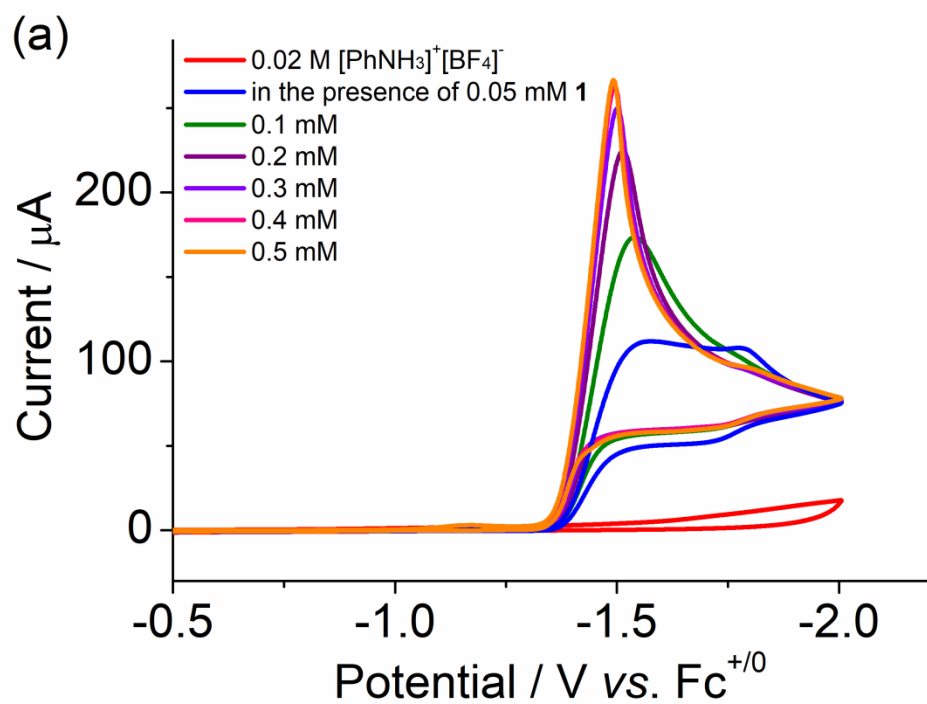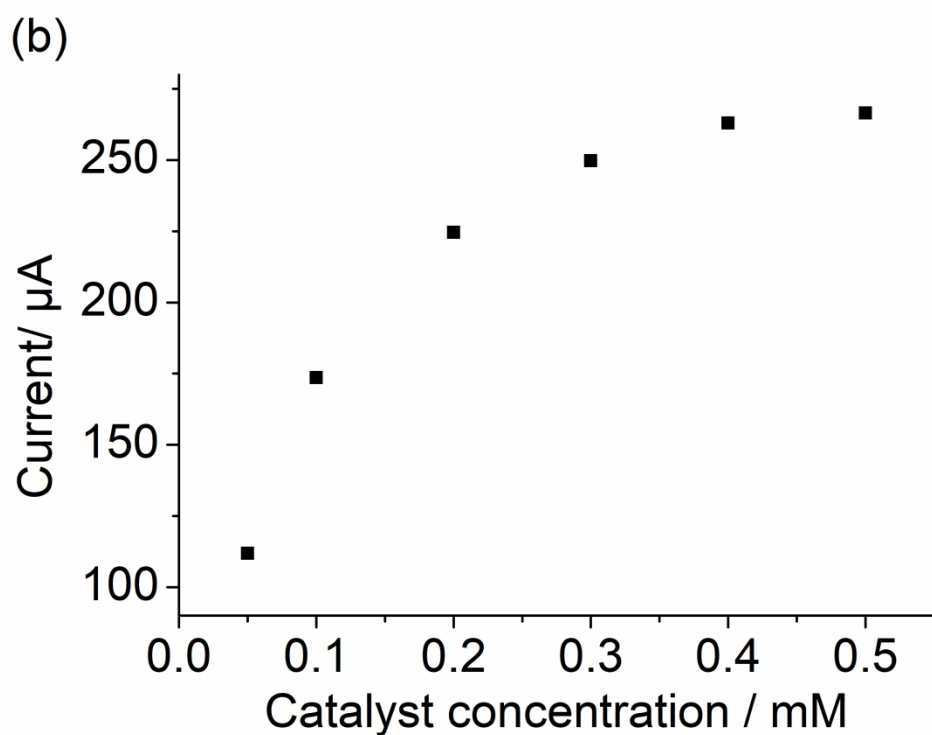

Figure S 12 (a) Cyclic voltammograms of 0.02 M [PhNH<sub>3</sub>]<sup>+</sup>[BF<sub>4</sub>]<sup>-</sup> with varied concentrations of **1** (0.05–0.5 mM) under Ar. (b) Plot of  $i_{\text{cat}}$  versus concentrations of complex **1**. Voltammograms are taken at a scan rate of 100 mV/s, in CH<sub>3</sub>CN/DMF (5:1) with 0.1 M <sup>n</sup>Bu<sub>4</sub>NPF<sub>6</sub>.

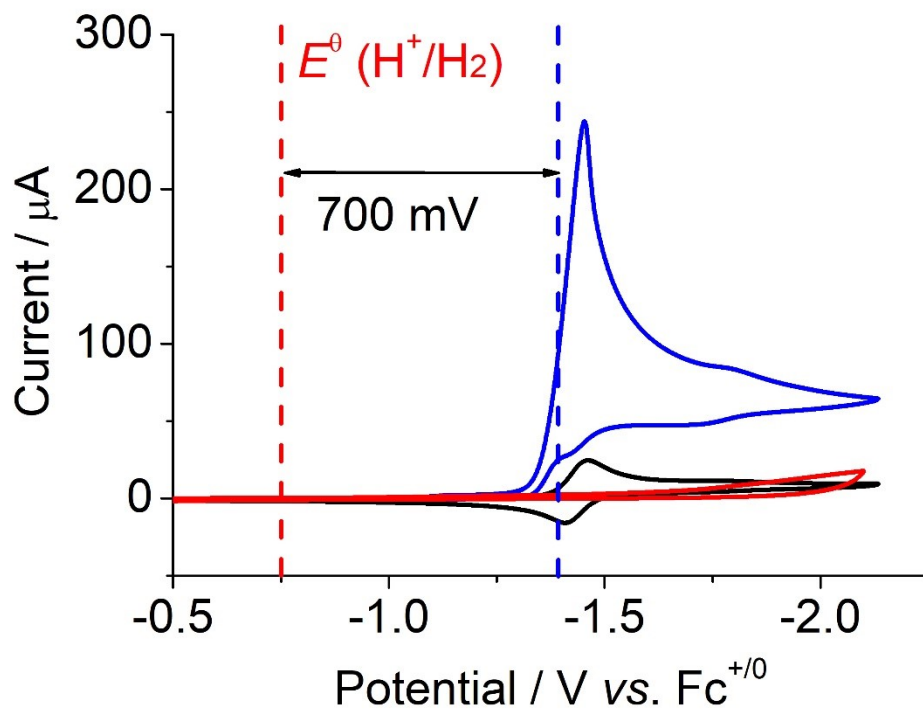

Figure S 13 The CVs of complex **1** (0.5 mM) in the presence (blue) and absence (black) of 0.01 M [PhNH<sub>3</sub>][BF<sub>4</sub>]. CV of 0.01 M [PhNH<sub>3</sub>][BF<sub>4</sub>] in the absence of catalyst (red). Voltammograms are taken at a scan rate of 100 mV/s, in CH<sub>3</sub>CN/DMF (5:1) with 0.1 M <sup>n</sup>Bu<sub>4</sub>NPF<sub>6</sub> under Ar.

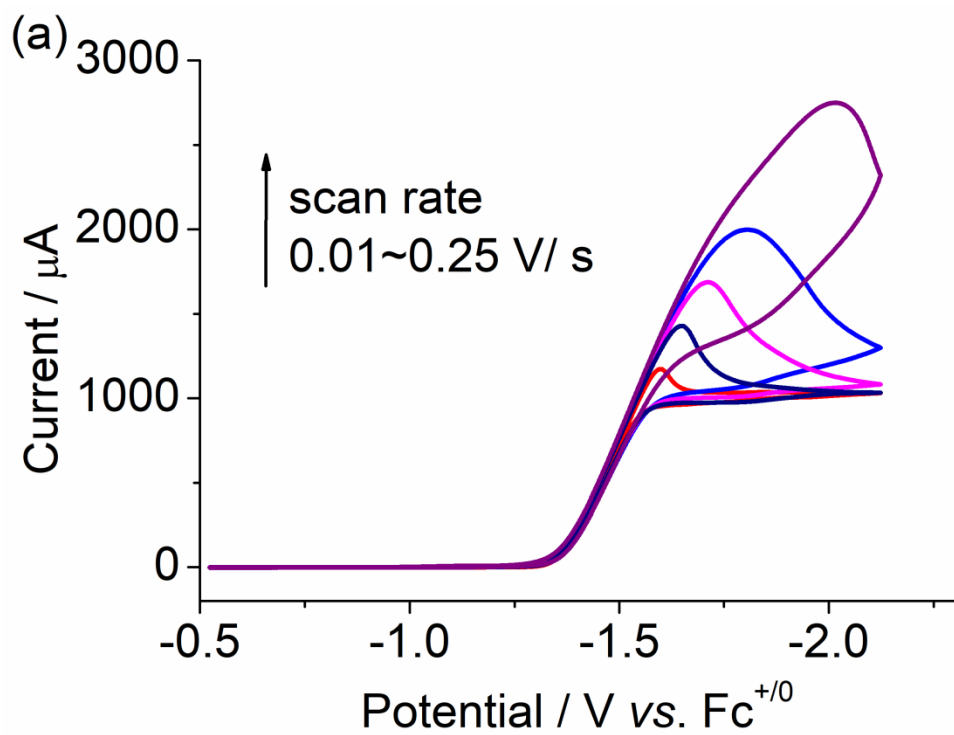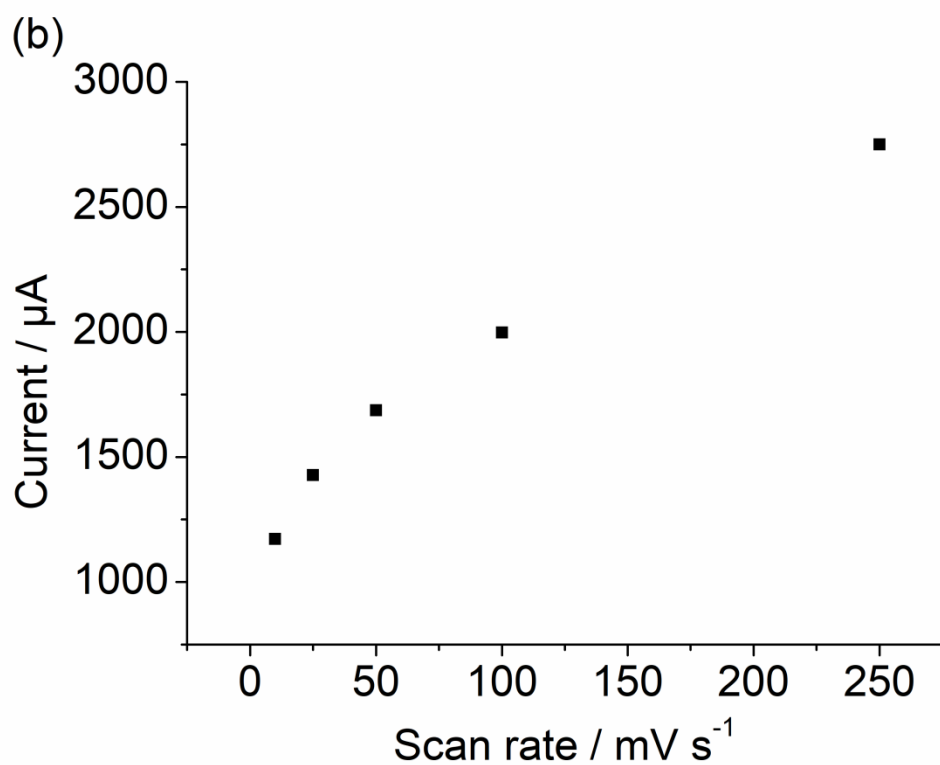

Figure S 14 (a) Cyclic voltammogram of 0.5 mM complexes **1** at varied scan rate from 10 mV/s to 250 mV/s in the presence of 0.2 M  $[\text{PhNH}_3]^+[\text{BF}_4]^-$  under Ar. (b) the dependence of catalytic peak currents on the scan rates. Voltammograms are taken in  $\text{CH}_3\text{CN}/\text{DMF}$  (5:1) with 0.1 M  $n\text{Bu}_4\text{NPF}_6$ .



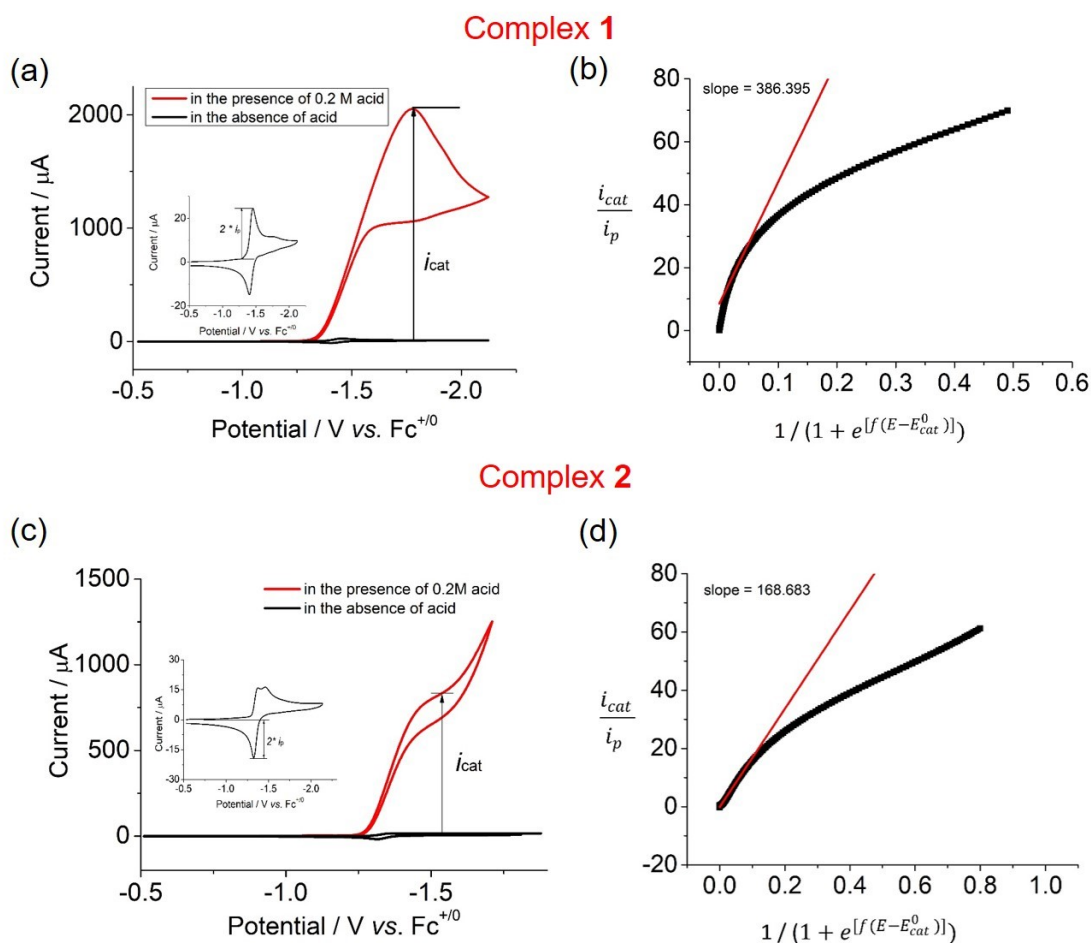

Figure S 15 (a) Cyclic voltammograms of 0.5 mM **1** in the absence and presence of 0.2 M  $[\text{PhNH}_3]^+[\text{BF}_4]^-$  under Ar at scan rate 100 mV/s with 0.1 M  $n\text{Bu}_4\text{NPF}_6$  in  $\text{CH}_3\text{CN}/\text{DMF}$  (5:1). Inset: magnification of the CV of **1**. (b) Foot-of-the-wave analyses of the voltammograms in (a). (c) Cyclic voltammograms of 0.5 mM **1** in the absence and presence of 0.2 M  $[\text{PhNH}_3]^+[\text{BF}_4]^-$  under the same condition as (a), Inset: magnification of the CV of **2**. (d) Foot-of the-wave analyses of the voltammograms in (c).

**Calculation of TOF** The calculation uses the **Foot-of-the-Wave Analysis (FOWA)** methods referred by Artero and Savéant (Energy & Environmental Science, **2014**, *7(11)*, 3808-3814).

At the outset of each experiment, a cyclic voltammogram was measured of catalyst alone under inert atmosphere in the absence of proton source, from which  $E_{cat}^0$  could be determined. The half of the peak height of the formal  $1/(1^{2-} - \text{Br}^-)$  couple,  $i_p$ , was determined by taking the difference between peak cathodic current and baseline current before this couple. Thus, proton reduction with complex **1** may be described as a EECC'

process, in which the rate-determining step involves pre-equilibrium  $H^+$  binding to the nucleophilic  $Mn(0)$  center ( $k_1 \ll k_2$ ).

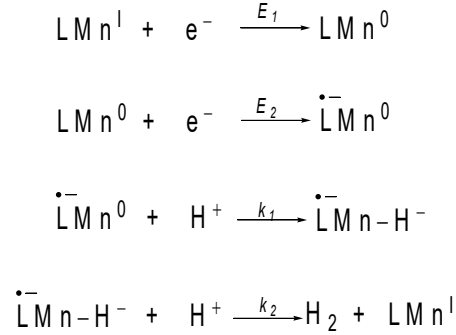

The following relationship may be derived:

$$\frac{i_{cat}}{i_p} = \frac{4.48 \sqrt{\frac{k_{obs}}{fv}}}{1 + e^{[f(E - E_{cat}^0)]}} \quad (1)$$

$$k_{obs} = (slope)^2 \times v \times 1.94 \quad (2)$$

where  $i_{cat}$  is the catalytic current,  $E$  is the potential,  $v$  is the scan rate (V/s),  $k_{obs}$  is the observed rate constant, and  $f = F/RT = 38.94 \text{ V}^{-1}$ . Thus, a ‘‘FOW’’ plot of  $\frac{i_{cat}}{i_p}$  versus  $\frac{1}{1 + e^{[f(E - E_{cat}^0)]}}$  yields a straight line with slope  $4.48 \sqrt{\frac{k_{obs}}{fv}}$ , from which  $k_{obs}$  may be determined.

At 100 mV/s, the values of *slope* for complex **1** and **2** are 386 and 169, corresponding to TOFs of  $2.89 \times 10^4 \text{ s}^{-1}$  and  $5.41 \times 10^3 \text{ s}^{-1}$ , respectively.

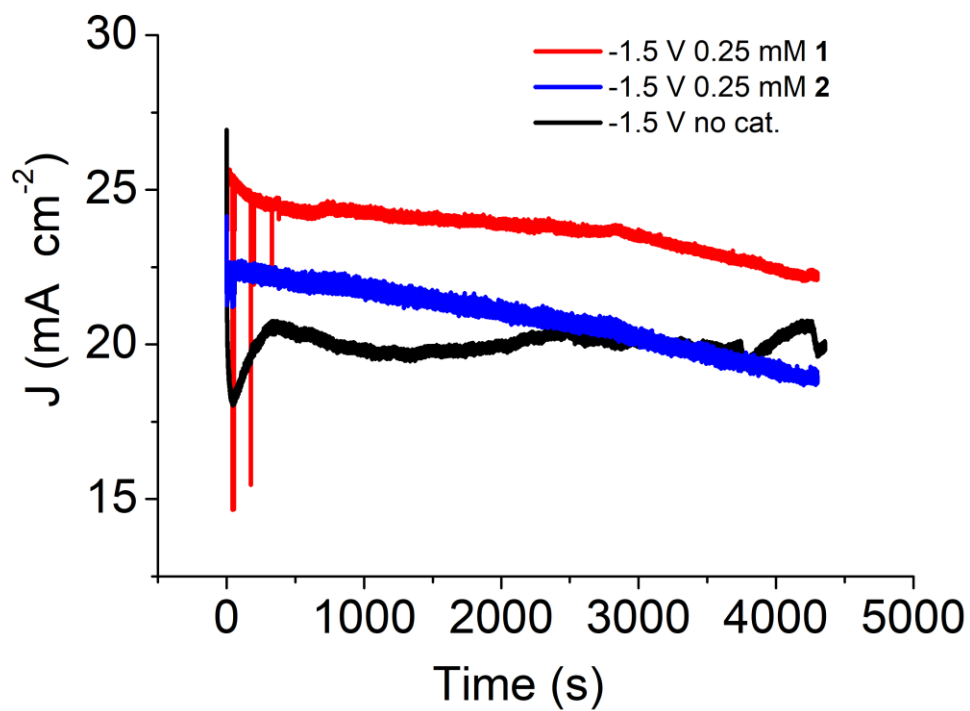

Figure S 16 Controlled potential electrolysis at  $-1.5 \text{ V vs. Fc}^{+/0}$  in the presence (red) of  $0.25 \text{ mM } \mathbf{1}$  or  $\mathbf{2}$  (blue) and in the absence of catalyst (black) under Ar. Conditions:  $0.1 \text{ M } ^t\text{Bu}_4\text{NPF}_6$  in  $\text{CH}_3\text{CN}/\text{DMF}$  (5:1) with  $0.2 \text{ M } [\text{PhNH}_3]^+[\text{BF}_4]^-$ , glassy carbon working electrode, graphite rod counter electrode,  $\text{Ag}^+/\text{Ag}$  reference electrode.

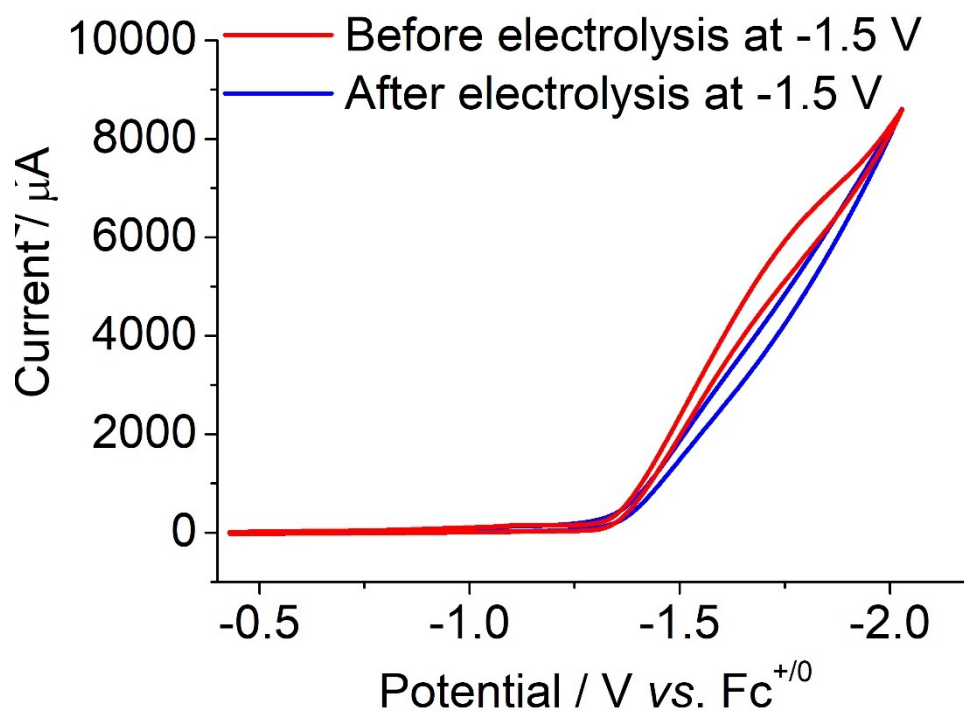

Figure S 17 Cyclic voltammograms of 0.25 mM **1** before (red line) and after (blue line) controlled potential electrolysis at  $-1.5\text{ V vs. Fc}^{+/0}$  in the presence of 0.2 M  $[\text{PhNH}_3]^+[\text{BF}_4]^-$  under Ar. Conditions: 0.1 M  $n\text{Bu}_4\text{NPF}_6$  in  $\text{CH}_3\text{CN}/\text{DMF}$  (5:1) with 0.2 M  $[\text{PhNH}_3]^+[\text{BF}_4]^-$ , glassy carbon working electrode, graphite rod counter electrode,  $\text{Ag}^+/\text{Ag}$  reference electrode.

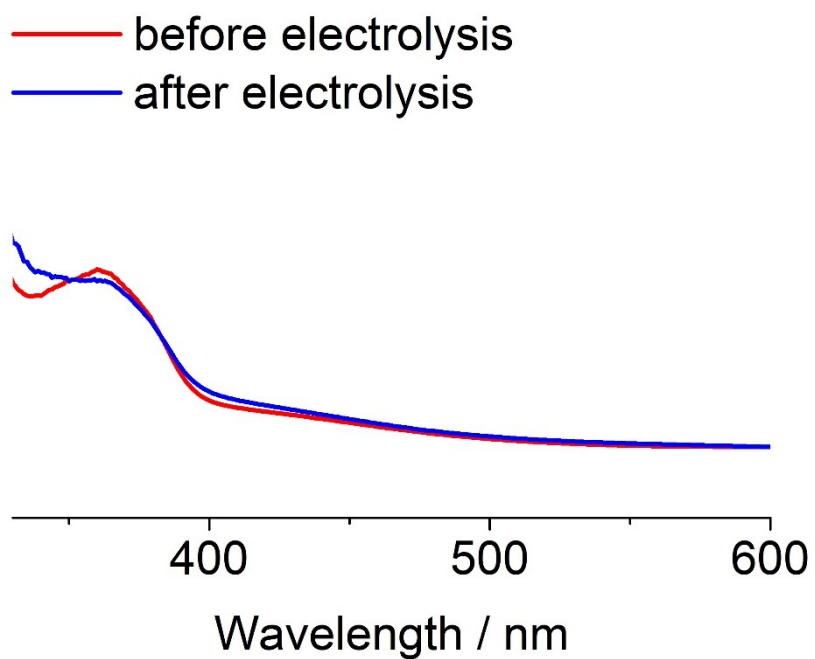

Figure S 18 Ultraviolet-visible absorption spectra of 0.25 mM **1** before (red line) and after (blue line) controlled potential electrolysis at  $-1.5$  V vs.  $\text{Fc}^{+/0}$  in the presence of 0.2 M  $[\text{PhNH}_3]^+[\text{BF}_4]^-$  under Ar.

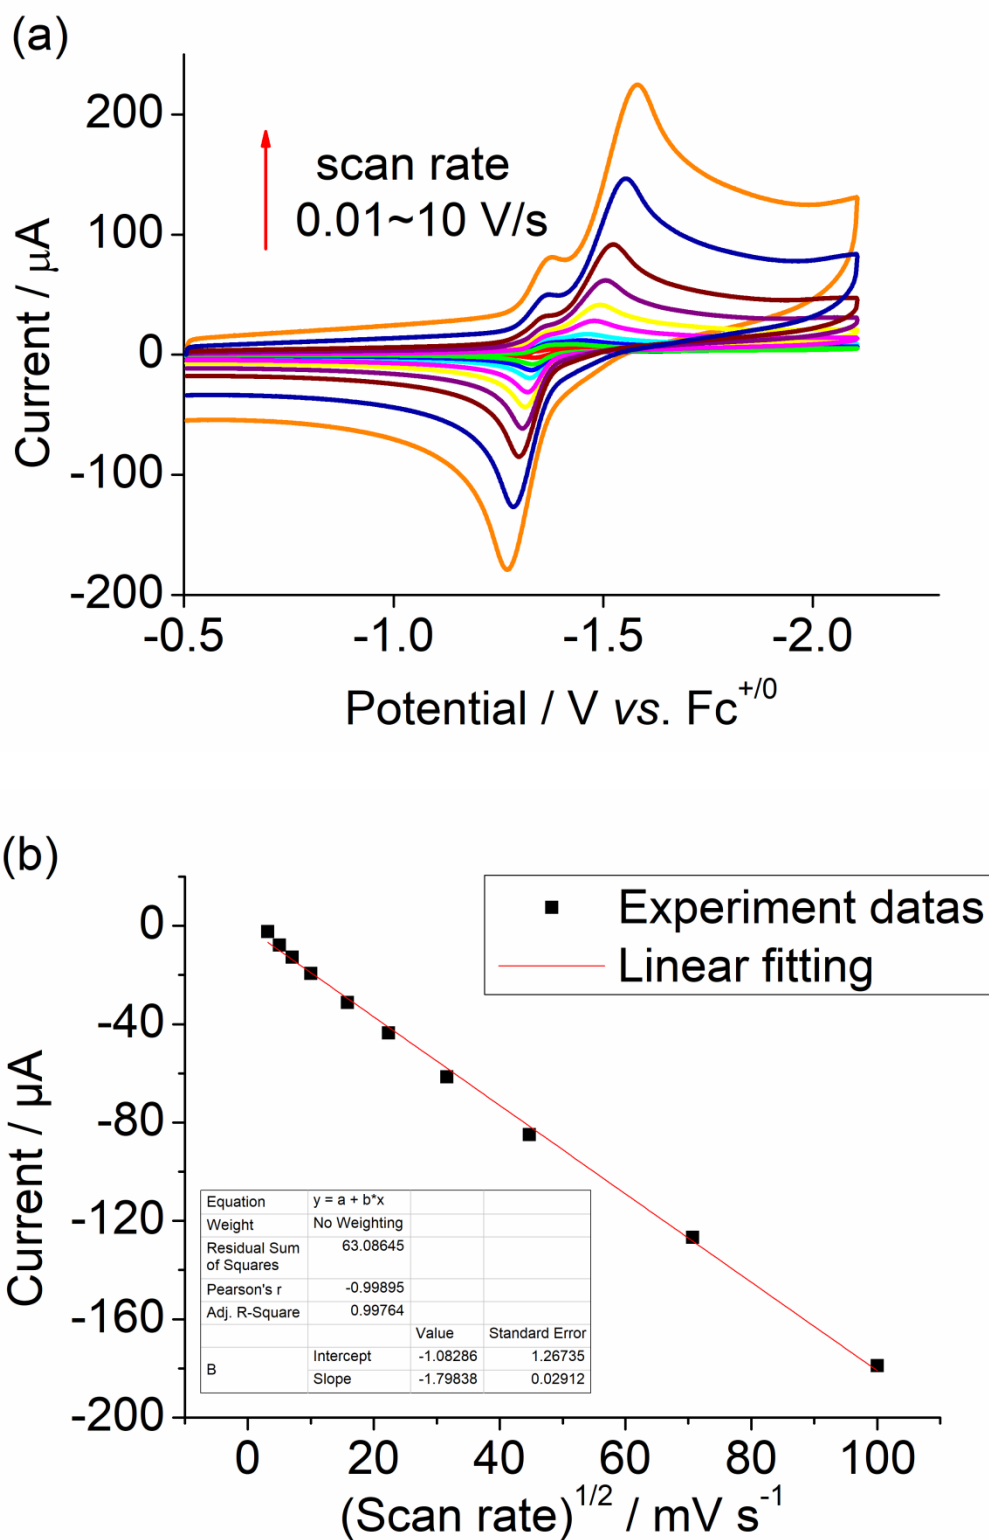

Figure S 19 (a) The CVs of complex **2** (0.5 mM) in  $n\text{Bu}_4\text{NPF}_6$  (0.1 M)  $\text{CH}_3\text{CN}/\text{DMF}$  (5:1) solution with scan rate varied from 0.01 V/s to 10 V/s under Ar; (b) Plot of anodic peak current ( $i_p$ ) vs.  $v^{1/2}$  for **2**

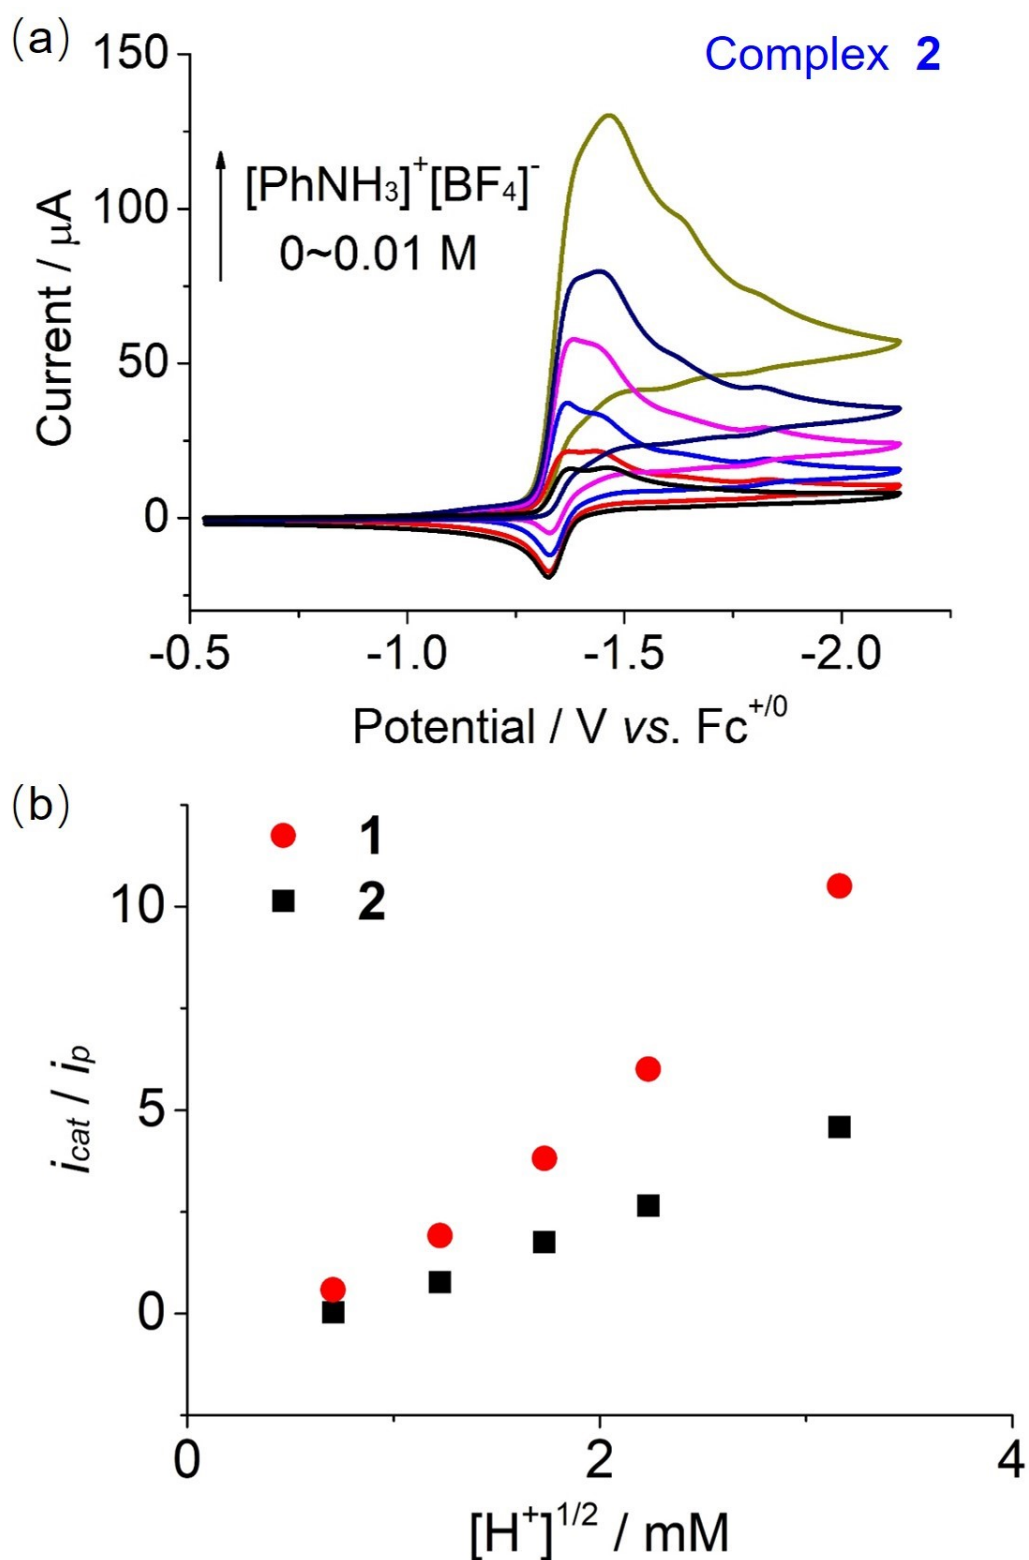

Figure S 20 (a) CVs of 0.5 mM **2** with anilinium tetrafluoroborate (0 ~ 0.01 M from bottom to top) under Ar. (b) Linear dependence of  $i_{\text{cat}}/i_p$  on the square root of acid concentration from 0.5 to 10 mM for **1** (red square) and **2** (black square). Condition: 3 mm glassy-carbon working electrode; 25°C; scan rate, 100 mV/s.; 0.1 M  $n\text{Bu}_4\text{NPF}_6$  as supporting electrolyte in  $\text{CH}_3\text{CN}/\text{DMF}$  (5:1).

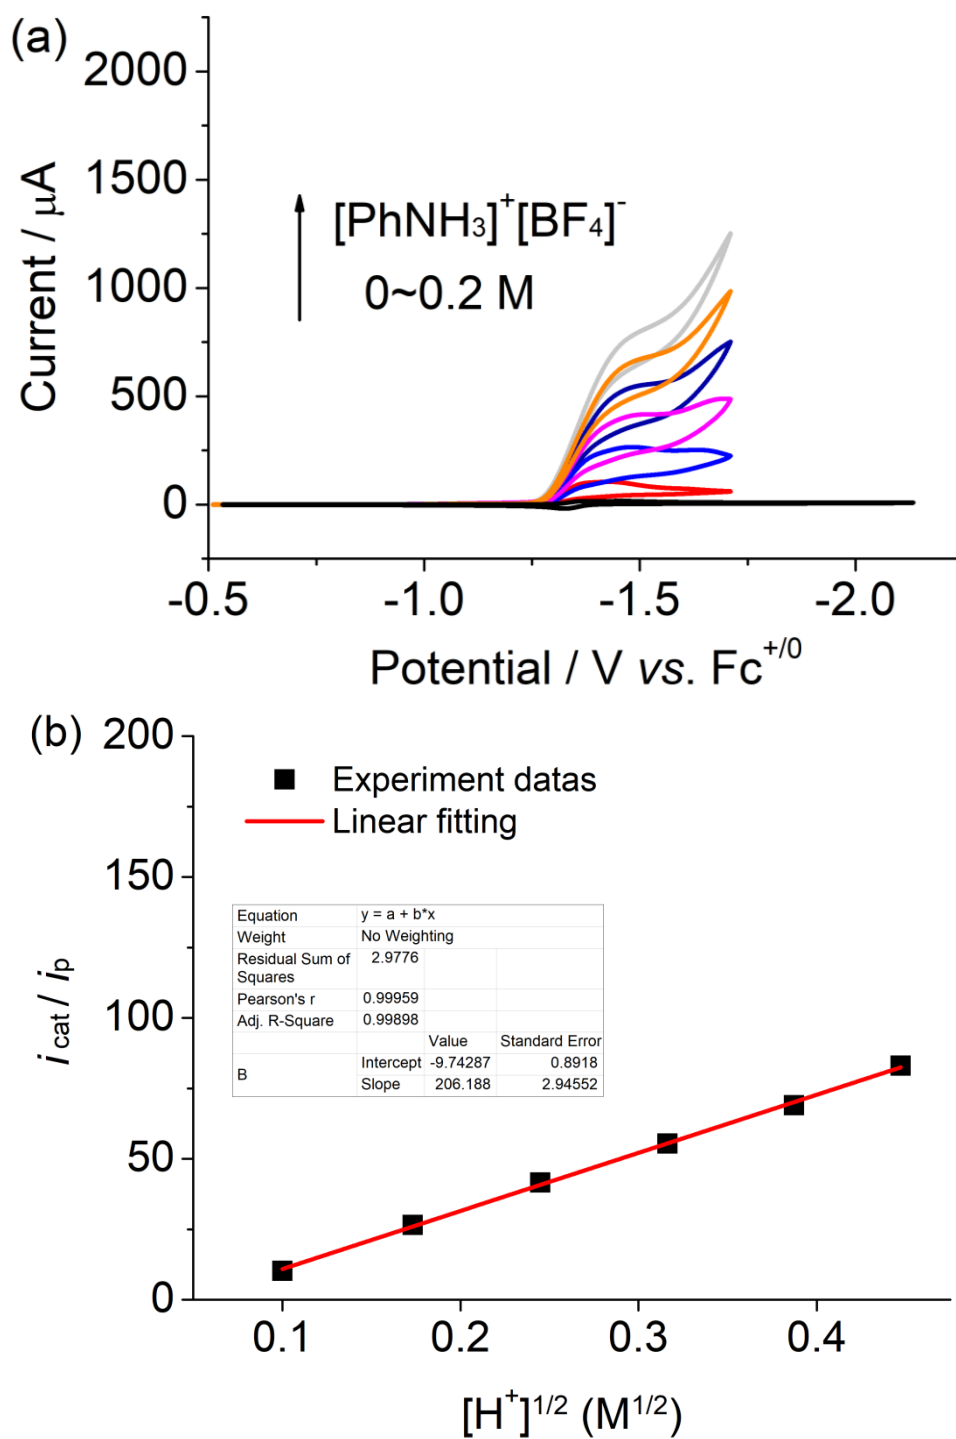

Figure S 21 (a) CVs of 0.5 mM **2** with anilinium tetrafluoroborate (0 ~ 0.2 M from bottom to top) under Ar. (b) linear dependence of  $i_{cat}/i_p$  on the square root of acid concentration from 0.01 to 0.2 M for **2**. Condition: 3 mm glassy-carbon working electrode; 25°C; scan rate, 100 mV/s.; 0.1 M  $n\text{-Bu}_4\text{NPF}_6$  as supporting electrolyte in  $\text{CH}_3\text{CN}/\text{DMF}$  (5:1).



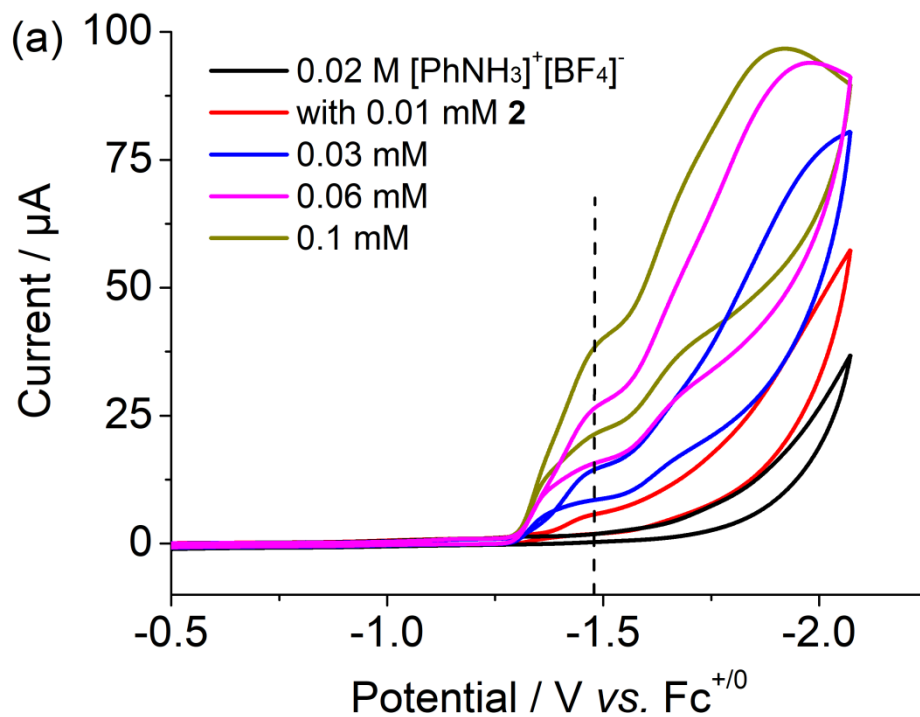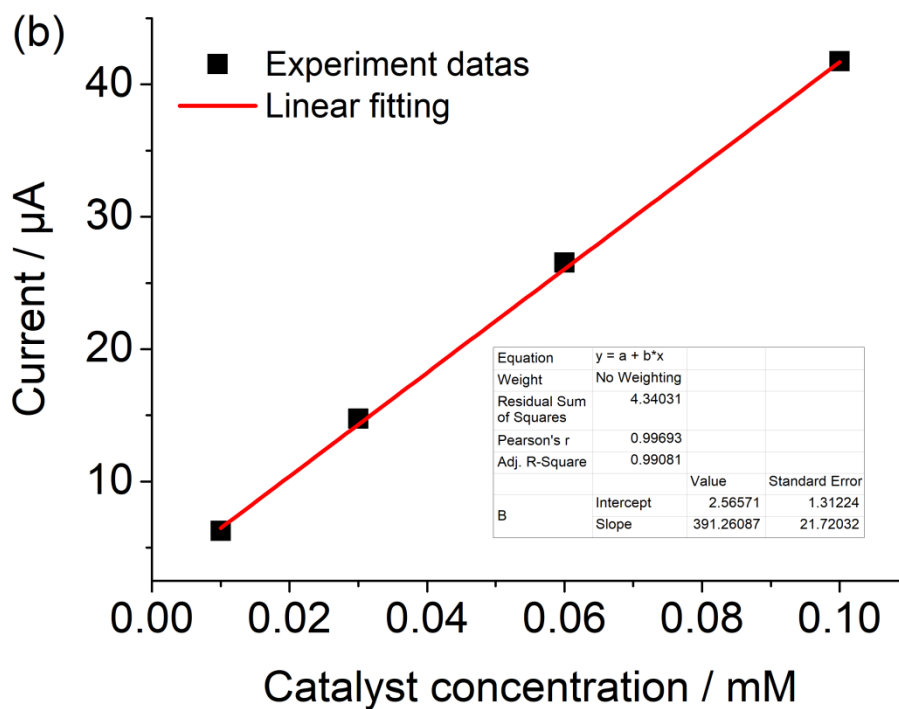

Figure S 22 (a) Cyclic voltammograms of 0.02 M  $[\text{PhNH}_3]^+[\text{BF}_4]^-$  with varied concentrations of **2** (0–0.1 mM) under Ar. (b) Plot of  $i_{\text{cat}}$  versus concentrations of complex **2**. Voltammograms are taken at a scan rate of 100 mV/s, in  $\text{CH}_3\text{CN}/\text{DMF}$  (5:1) with 0.1 M  $n\text{Bu}_4\text{NPF}_6$ .

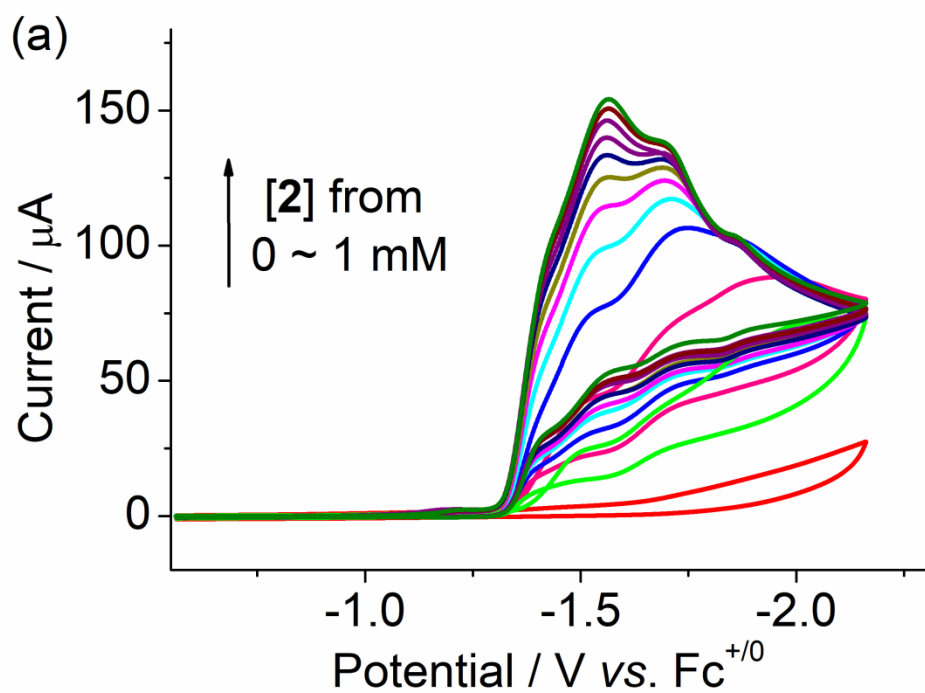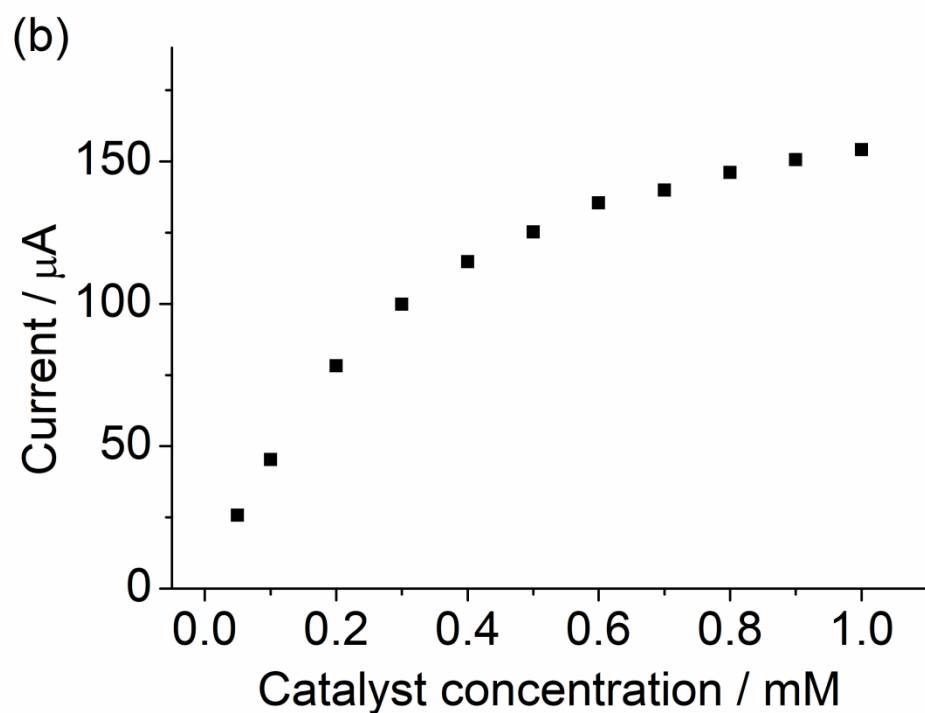

Figure S 23 (a) Cyclic voltammograms of 0.02 M  $[\text{PhNH}_3]^+[\text{BF}_4]^-$  with varied concentrations of **2** (0.05 – 1 mM) under Ar. (b) Plot of  $i_{\text{cat}}$  versus concentrations of complex **2**. Voltammograms are taken at a scan rate of 100 mV/s, in  $\text{CH}_3\text{CN}/\text{DMF}$  (5:1) with 0.1 M  $n\text{Bu}_4\text{NPF}_6$ .

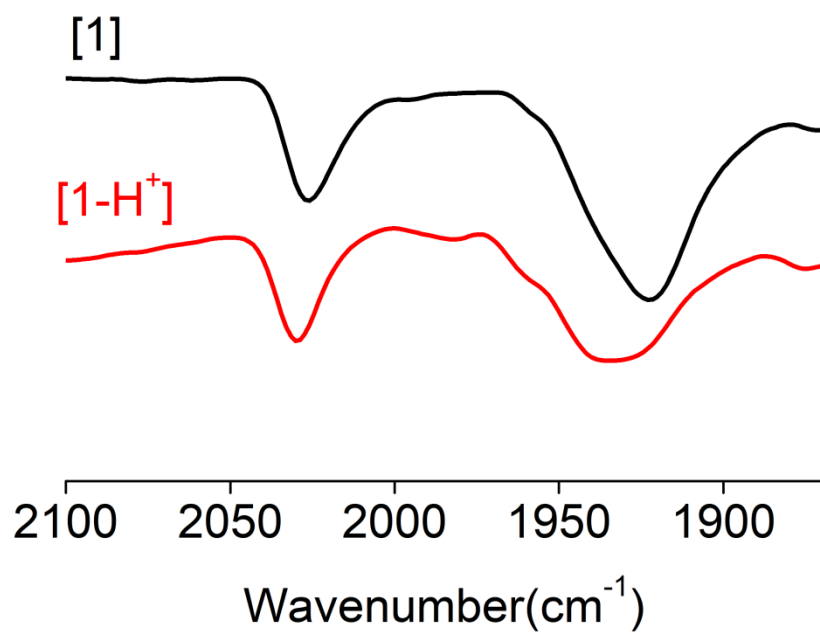

Figure S 24 Infrared spectra of complex **1** in the absence (black) and presence (red) of 10 equiv [PhNH<sub>3</sub>]<sup>+</sup>[BF<sub>4</sub>]<sup>-</sup> in MeCN.

## 12. DFT Calculations

### Computational Details.

All geometry optimizations and vibrational frequency calculations were obtained from density functional theory with the M06 exchange-correlation functional<sup>1</sup> computations as implemented in Gaussian 09<sup>2</sup>. Nonmetals (C, H, O, N) used 6-31G(d,p) basis set<sup>3, 4</sup> and SDD<sup>5</sup> was used for Mn. The single point energies of optimized structures were calculated at M06/[6-311++G(d,p)+ SDD] level. All geometric structure optimizations, vibrational frequency calculations and single point energy calculations were obtained in acetonitrile solvent using the polarizable continuum model (CPCM)<sup>6,7</sup>.

The reduction potential  $E_{O|R}$  relative to the ferrocene/ferrocenium couple was

$$E_{O|R} = -\frac{\Delta G_{O|R}}{nF} - E_{SCE}^{ref} - 0.384V$$

calculated using the following formula:

$\Delta G$  is the total Gibbs free energy;  $n$  is the number of electrons involved in the electrochemistry reaction.  $F$  is Faraday's constant.  $E_{SCE}^{ref}$  is taken as  $-4.422 V^8$ , which is the absolute potential of saturated calomel electrode (SCE) in acetonitrile solution.  $-0.384V$  is the shift value of reduction potential for ferrocene/ferrocenium couple relative to SCE.<sup>9</sup> For the reactions involving the participation of electrons, the energy contributions due to the least negative reductive potential were added to all the species after each electronreduction step.

### Refs

- [1] Zhao, Y.; Truhlar, D. G. The M06 suite of density functionals for main group thermochemistry, thermochemical kinetics, noncovalent interactions, excited states, and transition elements: two new functionals and systematic testing of four M06-class functionals and 12 other functionals. *Theor. Chem. Acc.* **2008**, 120, 215-241.
- [2] Frisch, M. J.; Trucks, G. W.; Schlegel, H. B.; Scuseria, G. E.; Robb, M. A.; Cheeseman, J. R.; Scalmani, G.; Barone, V.; Mennucci, B.; Petersson, G. A.; Nakatsuji, H.; Caricato, M.; Li, X.; Hratchian, H. P.; Izmaylov, A. F.; Bloino, J.; Zheng, G.; Sonnenberg, J. L.; Hada, M.; Ehara, M.; Toyota, K.; Fukuda, R.; Hasegawa, J.; Ishida, M.; Nakajima, T.; Honda, Y.; Kitao, O.;

- Nakai, H.; Vreven, T.; Montgomery, J. J. A.; Peralta, J. E.; Ogliaro, F.; Bearpark, M.; Heyd, J. J.; Brothers, E.; Kudin, K. N.; Staroverov, V. N.; Kobayashi, R.; Normand, J.; Raghavachari, K.; Rendell, A.; Burant, J. C.; Iyengar, S. S.; Tomasi, J.; Cossi, M.; Rega, N.; Millam, J. M.; Klene, M.; Knox, J. E.; Cross, J. B.; Bakken, V.; Adamo, C.; Jaramillo, J.; Gomperts, R.; Stratmann, R. E.; Yazyev, O.; Austin, A. J.; Cammi, R.; Pomelli, C.; Ochterski, J. W.; Martin, R. L.; Morokuma, K.; Zakrzewski, V. G.; Voth, G. A.; Salvador, P.; Dannenberg, J. J.; Dapprich, S.; Daniels, A. D.; Farkas; Foresman, J. B.; Ortiz, J. V.; Cioslowski, J.; Fox, D. J. Gaussian 09, Revision D.01; Gaussian, Inc.: Wallingford, CT, **2009**.
- [3] Hehre, W. J.; Ditchfield, R.; Pople, J. A. Self-consistent molecular orbital methods. XII. Further extensions of gaussian-type basis sets for use in molecular orbital studies of organic molecules. *J. Chem. Phys.* **1972**, 56, 2257-2261.
- [4] Hariharan, P. C.; Pople, J. A. The influence of polarization functions on molecular orbital hydrogenation energies. *Theor. Chim. Acta.* **1973**, 28, 213-222.
- [5] Dolg M.; Wedig U.; Stoll H.; Preuss H. Energy-adjusted ab initio pseudopotentials for the first row transition elements. *J. Chem. Phys.* **1987**, 86, 866-872.
- [6] Barone V.; Cossi M. Quantum calculation of molecular energies and energy gradients in solution by a conductor solvent model. *J. Phys. Chem. A.* **1998**, 102, 1995-2001.
- [7] Cossi M.; Rega N.; Scalmani G.; Barone V. Energies, structures, and electronic properties of molecules in solution with the C-PCM solvation model. *J. Comp. Chem.* **2003**, 24, 669-681.
- [8] Isse A. A.; Gennaro A. Absolute potential of the standard hydrogen electrode and the problem of interconversion of potentials in different solvents. *J. Phys. Chem. B* **2010**, 114, 7894-7899.
- [9] Ngo K. T.; McKinnon M.; Mahanti B.; Narayanan R.; Grills D. C.; Ertem M. Z.; Rochford J. Turning on the protonation-first pathway for electrocatalytic CO<sub>2</sub> reduction by manganese bipyridyl tricarbonyl complexes. *J. Am. Chem. Soc.* **2017**, 139, 2604-2618.

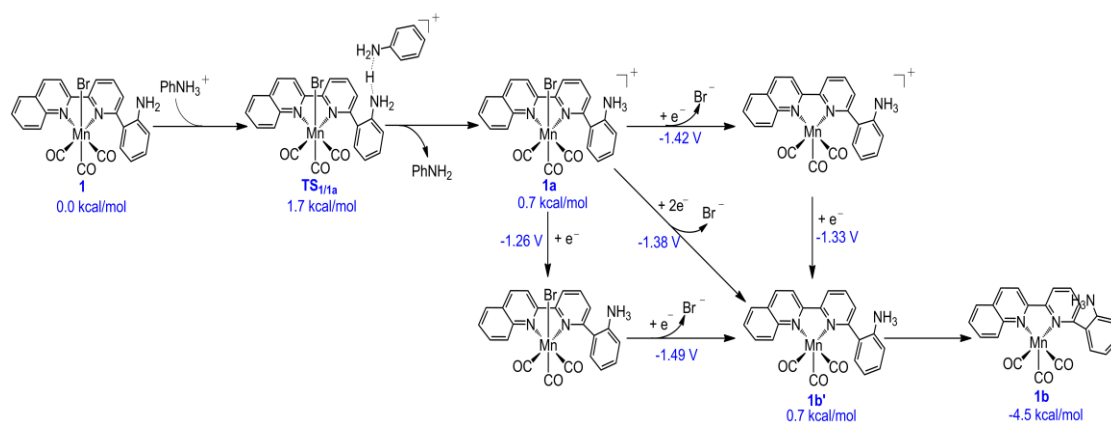

Scheme S 5 Computed reduction potentials (V vs.  $\text{Fc}^{+/0}$ ) and free energies (kcal/mol) for the generation of active catalyst **1b**.

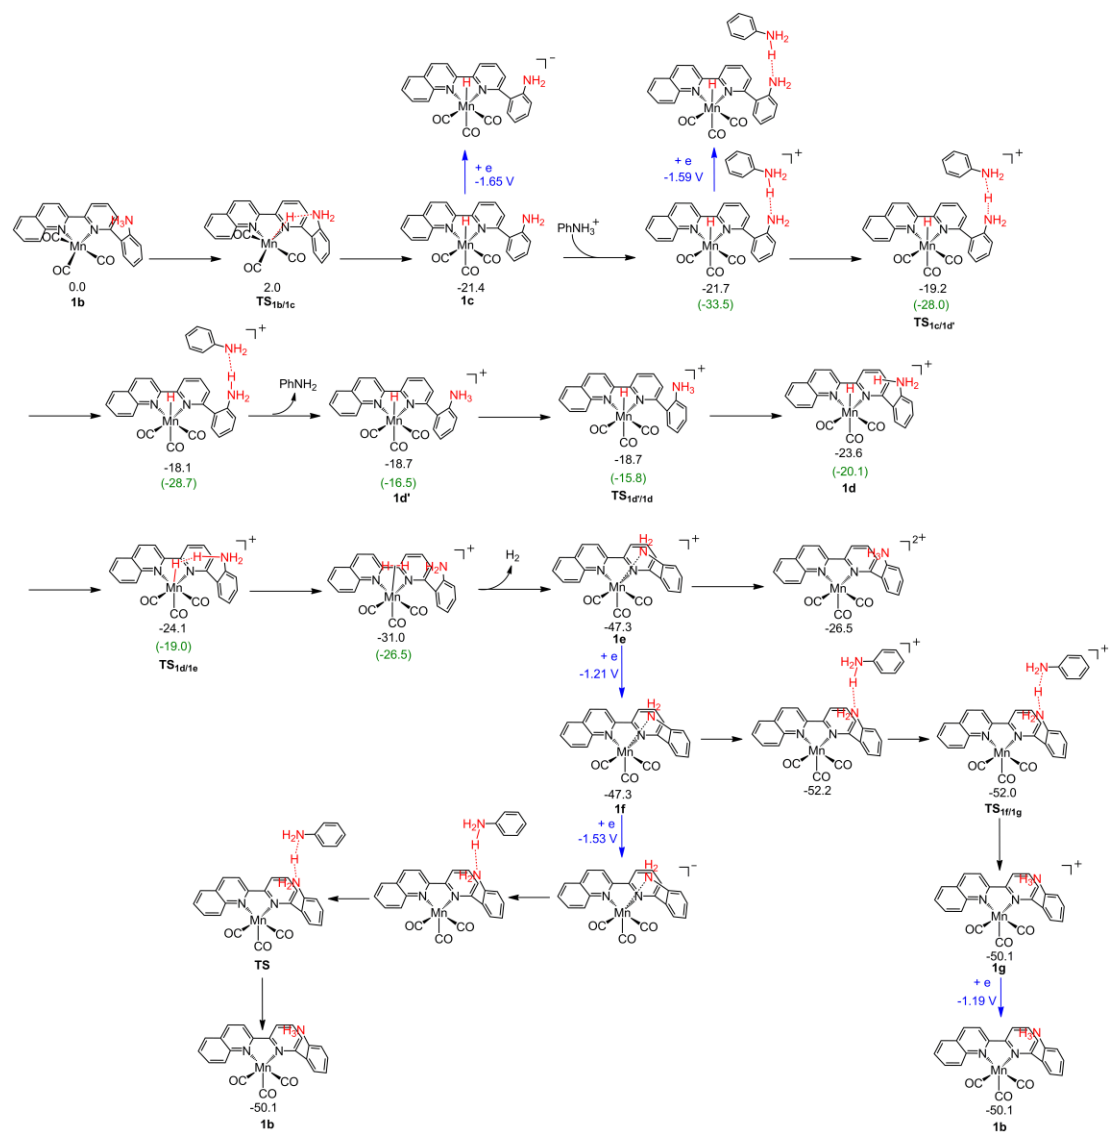

Scheme S 6 Detail mechanism for hydrogen evolution reaction via **path 1** along with the calculated free energies relative to **1b** (in kcal/mol). The values labeled in green are electronic energies relative to **1b**.

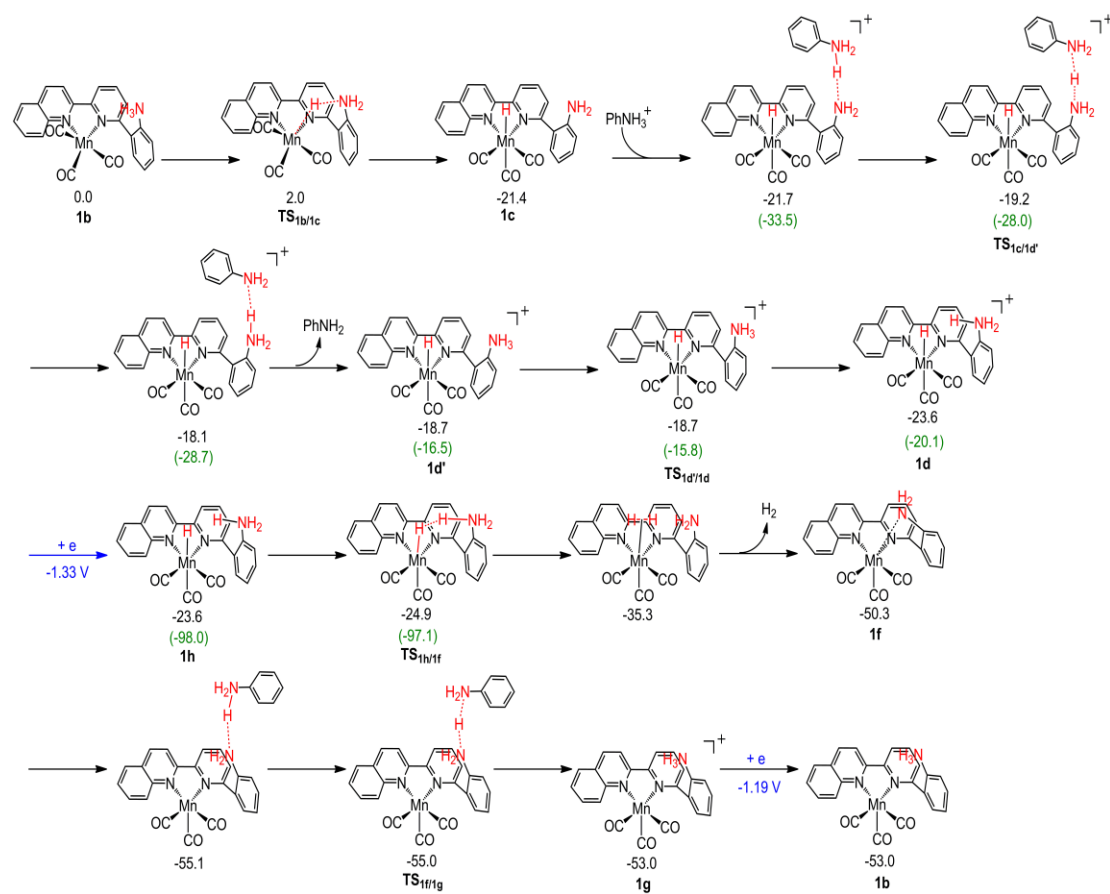

Scheme S 7 Detail mechanism for hydrogen evolution reaction via **path 2** along with the calculated free energies relative to **1b** (in kcal/mol). The values labeled in green are electronic energies relative to **1b**.



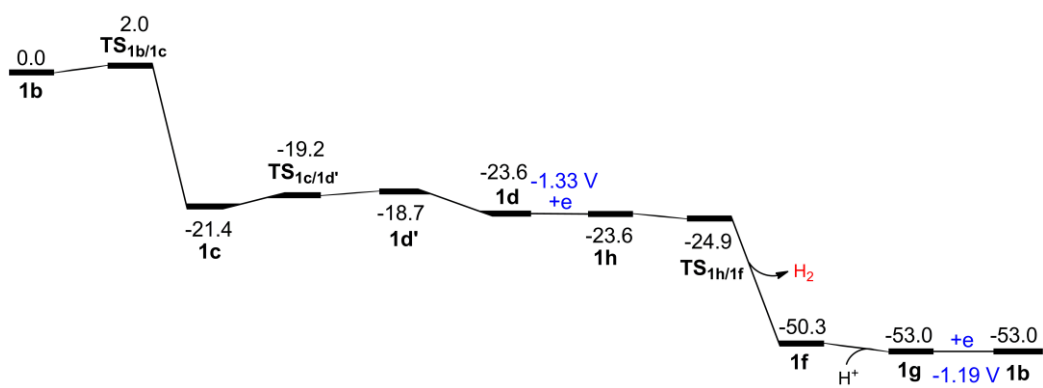

Scheme S 8 Free energy profile for hydrogen evolution reaction via **path 2**. Computed reduction potentials and free energies are given in V vs. Fc<sup>+/0</sup> and kcal/mol.

## Cartesian coordinates of optimized key structures

**1**

|    |             |             |             |
|----|-------------|-------------|-------------|
| Br | -0.07756600 | 0.34012500  | 2.37140500  |
| Mn | -0.08502600 | -0.77528100 | 0.07181000  |
| O  | -0.02251200 | -2.07466300 | -2.56290900 |
| O  | -1.39939000 | -2.99990200 | 1.48558600  |
| O  | 2.27634200  | -2.27815400 | 0.99207900  |
| N  | 0.71148900  | 1.05395000  | -0.55573300 |
| N  | -1.82108100 | 0.31130500  | -0.41468400 |
| C  | -0.04551600 | -1.55613500 | -1.52625300 |
| C  | -0.91622200 | -2.13244800 | 0.88994700  |
| C  | 1.41030300  | -1.62365100 | 0.59081600  |
| C  | 2.01147100  | 1.37397900  | -0.68977600 |
| C  | 2.42984300  | 2.70572700  | -0.77442500 |
| H  | 3.49230200  | 2.91192900  | -0.86453500 |
| C  | 1.49606000  | 3.72391200  | -0.75157600 |
| H  | 1.80124200  | 4.76360900  | -0.82342000 |
| C  | 0.15380400  | 3.38955400  | -0.64717100 |
| H  | -0.59719600 | 4.17078100  | -0.64146200 |
| C  | -0.20692200 | 2.05149600  | -0.54492800 |
| C  | -1.61067100 | 1.62646200  | -0.44107600 |
| C  | -2.66437700 | 2.56538400  | -0.39210000 |
| H  | -2.45671000 | 3.62864400  | -0.37811800 |
| C  | -3.95404100 | 2.11916700  | -0.33662600 |
| H  | -4.78441100 | 2.81836900  | -0.26741800 |
| C  | -4.21816000 | 0.73634300  | -0.41037100 |
| C  | -3.11075900 | -0.15775500 | -0.48158600 |
| C  | 3.05002400  | 0.32259300  | -0.76611100 |
| C  | 3.16953600  | -0.46467800 | -1.91345300 |
| C  | 4.20423200  | -1.38097600 | -2.04942900 |
| H  | 4.28914900  | -1.98528000 | -2.94828200 |
| C  | 5.14470400  | -1.49050900 | -1.02477000 |
| C  | 5.03789300  | -0.71966100 | 0.12284800  |
| H  | 5.76430700  | -0.82756300 | 0.92685100  |
| C  | 3.98249500  | 0.18841100  | 0.28124600  |
| C  | -3.37993500 | -1.53328900 | -0.67022900 |
| C  | -4.67350400 | -1.99311600 | -0.72631500 |
| C  | -5.76633000 | -1.11223100 | -0.59181300 |
| C  | -5.53812700 | 0.23191600  | -0.44508800 |
| H  | -2.55679200 | -2.22347100 | -0.81336300 |
| H  | -4.85457900 | -3.05273500 | -0.88621000 |
| H  | -6.78109500 | -1.49852900 | -0.62576300 |

|   |             |             |             |
|---|-------------|-------------|-------------|
| H | -6.36293500 | 0.93749500  | -0.37013100 |
| H | 5.96987400  | -2.19321700 | -1.11765400 |
| H | 2.44030700  | -0.33519700 | -2.71250600 |
| N | 3.86478400  | 0.94526500  | 1.43694500  |
| H | 4.40162100  | 0.59993800  | 2.22155700  |
| H | 2.91868400  | 1.18800800  | 1.71170600  |

**1a**

|    |             |             |             |
|----|-------------|-------------|-------------|
| Br | -0.04170300 | -0.24176700 | 2.26289500  |
| Mn | -0.08357900 | -0.78847300 | -0.22643300 |
| O  | -0.04986400 | -1.32681600 | -3.11881500 |
| O  | -1.36336400 | -3.31115700 | 0.59815400  |
| O  | 2.22340700  | -2.56820000 | 0.18510500  |
| N  | 0.72197800  | 1.14288600  | -0.45420400 |
| N  | -1.83397500 | 0.38925000  | -0.39595600 |
| C  | -0.07013200 | -1.11904200 | -1.98126000 |
| C  | -0.91013700 | -2.31393900 | 0.22867400  |
| C  | 1.38429400  | -1.78986700 | 0.00983100  |
| C  | 2.00738800  | 1.50499000  | -0.62546400 |
| C  | 2.39043400  | 2.83286100  | -0.80715100 |
| H  | 3.44200500  | 3.06265700  | -0.95355000 |
| C  | 1.42668600  | 3.82863100  | -0.79104400 |
| H  | 1.69752200  | 4.86905000  | -0.94127400 |
| C  | 0.10962500  | 3.46594700  | -0.56784900 |
| H  | -0.66730200 | 4.22174600  | -0.54997600 |
| C  | -0.21017300 | 2.12158000  | -0.39634100 |
| C  | -1.59828900 | 1.68378100  | -0.19506600 |
| C  | -2.60481200 | 2.59577900  | 0.18552100  |
| H  | -2.35761600 | 3.62845800  | 0.40375500  |
| C  | -3.88825400 | 2.14591800  | 0.32593400  |
| H  | -4.68065000 | 2.81233500  | 0.65897400  |
| C  | -4.19857900 | 0.81175600  | -0.00476300 |
| C  | -3.13510900 | -0.04964700 | -0.40474300 |
| C  | 3.08840300  | 0.48934400  | -0.56674700 |
| C  | 3.61572500  | -0.06548900 | -1.73226400 |
| C  | 4.69705200  | -0.93830400 | -1.67295700 |
| H  | 5.09397700  | -1.36670900 | -2.58871300 |
| C  | 5.27608900  | -1.25260300 | -0.44833100 |
| C  | 4.77145800  | -0.70123700 | 0.72502900  |

|   |             |             |             |
|---|-------------|-------------|-------------|
| H | 5.21891500  | -0.94255900 | 1.68632800  |
| C | 3.69171300  | 0.16151400  | 0.64897100  |
| C | -3.46470800 | -1.34565000 | -0.86361600 |
| C | -4.76792900 | -1.77958300 | -0.85611200 |
| C | -5.80859300 | -0.95096400 | -0.38695200 |
| C | -5.52649000 | 0.32706800  | 0.02149300  |
| H | -2.68739400 | -1.98046300 | -1.27320500 |
| H | -5.00026100 | -2.77319000 | -1.22985900 |
| H | -6.83039200 | -1.31938800 | -0.37597300 |
| H | -6.31568600 | 0.99890800  | 0.35195000  |
| H | 6.12518900  | -1.92757000 | -0.39963900 |
| H | 3.16600800  | 0.19720900  | -2.68755100 |
| N | 3.14255900  | 0.72182600  | 1.89337300  |
| H | 3.68955400  | 0.41609300  | 2.70292200  |
| H | 3.15833900  | 1.74743600  | 1.90056700  |
| H | 2.14751700  | 0.42422300  | 2.06796600  |

**1b**

|    |             |             |             |
|----|-------------|-------------|-------------|
| Mn | 0.04877200  | -0.72737400 | 0.34203600  |
| O  | 1.31250000  | -2.03069100 | 2.65279700  |
| O  | 0.48879100  | -2.87003900 | -1.62321300 |
| O  | -2.27846100 | -2.24274600 | 1.30894500  |
| N  | -0.74776400 | 1.10521000  | 0.16489900  |
| N  | 1.72701000  | 0.37030000  | 0.00299700  |
| C  | 0.80346500  | -1.47858000 | 1.74999600  |
| C  | 0.32098600  | -1.97443300 | -0.87663800 |
| C  | -1.40850400 | -1.57842900 | 0.88730000  |
| C  | -2.07580500 | 1.49685800  | 0.16495300  |
| C  | -2.46824900 | 2.81378400  | 0.28709800  |
| H  | -3.53097000 | 3.04161300  | 0.29347600  |
| C  | -1.51551300 | 3.84110700  | 0.34027400  |
| H  | -1.81558700 | 4.87987900  | 0.43575300  |
| C  | -0.19582300 | 3.48708500  | 0.20690600  |
| H  | 0.56979800  | 4.25606900  | 0.19446200  |
| C  | 0.17585000  | 2.13627600  | 0.10259500  |
| C  | 1.53379900  | 1.71394400  | -0.02618300 |
| C  | 2.60337200  | 2.63735500  | -0.18343800 |
| H  | 2.39524200  | 3.70169200  | -0.21200600 |
| C  | 3.87874700  | 2.19212600  | -0.31105700 |

|   |             |             |             |
|---|-------------|-------------|-------------|
| H | 4.71064900  | 2.88183400  | -0.43633600 |
| C | 4.13082700  | 0.79255900  | -0.28530700 |
| C | 3.03388000  | -0.09926900 | -0.12691700 |
| C | -3.15490600 | 0.50647700  | -0.04461300 |
| C | -4.23487500 | 0.43543100  | 0.84172700  |
| C | -5.30111500 | -0.42581700 | 0.61460500  |
| H | -6.12030800 | -0.46626400 | 1.32751100  |
| C | -5.32067300 | -1.23820800 | -0.51478900 |
| C | -4.26981800 | -1.17651700 | -1.42353700 |
| H | -4.27367600 | -1.79336800 | -2.31963000 |
| C | -3.22229200 | -0.30425400 | -1.18314600 |
| H | -1.21231000 | -0.48943900 | -1.63186400 |
| C | 3.31840600  | -1.48039200 | -0.10467900 |
| C | 4.60987800  | -1.95049000 | -0.23077200 |
| C | 5.68703700  | -1.06541200 | -0.38660000 |
| C | 5.44013300  | 0.28879000  | -0.41328700 |
| H | 2.50139000  | -2.18094600 | 0.01775400  |
| H | 4.78867500  | -3.02300700 | -0.20886100 |
| H | 6.70076300  | -1.44492900 | -0.48547700 |
| H | 6.25446600  | 1.00186400  | -0.53330900 |
| H | -6.15094600 | -1.91447700 | -0.69551000 |
| H | -4.21572000 | 1.05891900  | 1.73296500  |
| N | -2.11792300 | -0.24527400 | -2.13815000 |
| H | -1.99714700 | 0.68959900  | -2.53937000 |
| H | -2.24835500 | -0.89847000 | -2.91386400 |

**TS<sub>1b/1c</sub>**

|    |             |             |             |
|----|-------------|-------------|-------------|
| Mn | 0.00925000  | -0.71681000 | 0.39204400  |
| O  | 1.36985200  | -1.74662800 | 2.79279000  |
| O  | 0.27847900  | -2.98782800 | -1.44172100 |
| O  | -2.30107700 | -2.06351600 | 1.61330400  |
| N  | -0.75754900 | 1.15187500  | 0.16636700  |
| N  | 1.70960400  | 0.36659600  | -0.03233800 |
| C  | 0.81677300  | -1.27251800 | 1.87211100  |
| C  | 0.19117100  | -2.04067000 | -0.73836000 |
| C  | -1.43250900 | -1.48326500 | 1.08392500  |
| C  | -2.07404000 | 1.52632300  | 0.09097900  |
| C  | -2.46398500 | 2.85679700  | 0.16561900  |
| H  | -3.52330900 | 3.09460900  | 0.12164700  |

|   |             |             |             |
|---|-------------|-------------|-------------|
| C | -1.50821800 | 3.86714000  | 0.23346200  |
| H | -1.80150300 | 4.91095600  | 0.28899400  |
| C | -0.17841100 | 3.50616900  | 0.15733300  |
| H | 0.58875500  | 4.27265000  | 0.13916100  |
| C | 0.17407300  | 2.15455800  | 0.10393700  |
| C | 1.54151700  | 1.70269100  | -0.02540100 |
| C | 2.61969300  | 2.61334600  | -0.16154800 |
| H | 2.43255200  | 3.68135300  | -0.15040000 |
| C | 3.88759600  | 2.14541200  | -0.31506200 |
| H | 4.73048500  | 2.82402900  | -0.42555900 |
| C | 4.11266000  | 0.74681100  | -0.33109600 |
| C | 2.99858200  | -0.12633000 | -0.18035200 |
| C | -3.12718500 | 0.51813100  | -0.14767700 |
| C | -4.27678500 | 0.50535900  | 0.65202300  |
| C | -5.30423600 | -0.39920200 | 0.42785400  |
| H | -6.17691100 | -0.39793500 | 1.07536100  |
| C | -5.20978400 | -1.31204000 | -0.62087600 |
| C | -4.09432900 | -1.30189600 | -1.44645600 |
| H | -4.01632900 | -1.99856600 | -2.27905900 |
| C | -3.07469900 | -0.38171800 | -1.22587900 |
| H | -0.91239200 | -0.78032000 | -1.30666800 |
| C | 3.24786200  | -1.51618000 | -0.18194800 |
| C | 4.52523800  | -2.00860800 | -0.33230300 |
| C | 5.62156300  | -1.14188900 | -0.48762600 |
| C | 5.41096500  | 0.21592900  | -0.48594000 |
| H | 2.41290200  | -2.19496200 | -0.05596100 |
| H | 4.68414700  | -3.08423200 | -0.33012100 |
| H | 6.62398800  | -1.54463400 | -0.60628400 |
| H | 6.24082000  | 0.91103200  | -0.60103000 |
| H | -6.00837400 | -2.02600300 | -0.80268700 |
| H | -4.33890600 | 1.20386400  | 1.48425800  |
| N | -1.91126500 | -0.41452400 | -2.05584600 |
| H | -1.63676700 | 0.50352300  | -2.40575600 |
| H | -2.01501600 | -1.04505100 | -2.84956100 |

**1c**

|    |             |             |             |
|----|-------------|-------------|-------------|
| Mn | 0.10784500  | -0.75062800 | -0.44425300 |
| O  | -0.03888100 | -2.22980100 | 2.13729600  |

|   |             |             |             |
|---|-------------|-------------|-------------|
| O | 1.49744600  | -2.81336800 | -1.98853200 |
| O | -2.26099600 | -2.09986000 | -1.53307500 |
| N | -0.70331800 | 1.11422600  | 0.06738100  |
| N | 1.82274200  | 0.37452800  | -0.00077300 |
| C | 0.01988900  | -1.59493700 | 1.16455100  |
| C | 0.96471200  | -2.01631300 | -1.32637300 |
| C | -1.36999800 | -1.52105700 | -1.05887700 |
| C | -2.00120500 | 1.43908900  | 0.24246700  |
| C | -2.42028500 | 2.77253700  | 0.28173900  |
| H | -3.47532400 | 2.98421900  | 0.43624500  |
| C | -1.49610200 | 3.79400900  | 0.15093000  |
| H | -1.80590000 | 4.83454500  | 0.17428000  |
| C | -0.15760400 | 3.45871500  | 0.02407200  |
| H | 0.58950400  | 4.24068300  | -0.04738900 |
| C | 0.20912600  | 2.11617700  | -0.00025500 |
| C | 1.61390800  | 1.69084300  | -0.04645400 |
| C | 2.67059300  | 2.62824400  | -0.09495300 |
| H | 2.46273600  | 3.68924700  | -0.16901700 |
| C | 3.96162400  | 2.18506900  | -0.06358400 |
| H | 4.79439200  | 2.88235900  | -0.12305100 |
| C | 4.22018400  | 0.80682400  | 0.08725800  |
| C | 3.11054300  | -0.08554600 | 0.13993800  |
| C | -3.01726600 | 0.38263900  | 0.44863600  |
| C | -2.96727200 | -0.39923200 | 1.60509700  |
| C | -3.93364000 | -1.35855600 | 1.87264500  |
| H | -3.88193600 | -1.95462700 | 2.77966300  |
| C | -4.98336600 | -1.52322700 | 0.96769900  |
| C | -5.05712800 | -0.74947700 | -0.17937000 |
| H | -5.87413900 | -0.89066700 | -0.88550600 |
| C | -4.07522500 | 0.21052400  | -0.46661900 |
| H | 0.19829100  | -0.08875500 | -1.90111700 |
| C | 3.36946600  | -1.45521300 | 0.38140900  |
| C | 4.65806400  | -1.91130000 | 0.51972800  |
| C | 5.75607100  | -1.03239700 | 0.41610500  |
| C | 5.53621100  | 0.30542800  | 0.20947700  |
| H | 2.53452800  | -2.13840000 | 0.48792900  |
| H | 4.83141300  | -2.96572700 | 0.71866100  |
| H | 6.76796900  | -1.41513500 | 0.51640600  |
| H | 6.36483100  | 1.00824100  | 0.15033000  |
| H | -5.75895600 | -2.26101900 | 1.16167700  |
| H | -2.15198500 | -0.23253100 | 2.30751800  |
| N | -4.10869700 | 0.89116400  | -1.67090600 |
| H | -3.60448700 | 1.76524300  | -1.72276100 |

|   |             |            |             |
|---|-------------|------------|-------------|
| H | -5.01052700 | 0.93576400 | -2.12455200 |
|---|-------------|------------|-------------|

**TS<sub>1c/1d'</sub>**

|    |             |             |             |
|----|-------------|-------------|-------------|
| Mn | 0.45647000  | -0.21481100 | -0.73430100 |
| O  | 0.94292100  | -2.44722400 | -2.65260800 |
| O  | 1.31426600  | 2.05895000  | -2.36885300 |
| O  | -2.10813000 | 0.41580000  | -2.00488500 |
| N  | -0.13532400 | -1.23798000 | 0.98882500  |
| N  | 2.27240300  | -0.43172700 | 0.30069000  |
| C  | 0.76937500  | -1.61534400 | -1.86114000 |
| C  | 1.01179500  | 1.11695700  | -1.75618900 |
| C  | -1.12243200 | 0.11608800  | -1.45383400 |
| C  | -1.35115400 | -1.74692800 | 1.27441300  |
| C  | -1.71095400 | -2.13082400 | 2.56589600  |
| H  | -2.70124400 | -2.54472600 | 2.73796700  |
| C  | -0.79622600 | -2.00011400 | 3.59933700  |
| H  | -1.05654700 | -2.28473300 | 4.61408100  |
| C  | 0.46795100  | -1.52351000 | 3.30097800  |
| H  | 1.20910700  | -1.43594100 | 4.08673600  |
| C  | 0.77455500  | -1.16218600 | 1.99010800  |
| C  | 2.11548000  | -0.71405100 | 1.59428300  |
| C  | 3.17294000  | -0.63263600 | 2.52746600  |
| H  | 3.00104300  | -0.84044900 | 3.57700600  |
| C  | 4.41895600  | -0.27719100 | 2.09641500  |
| H  | 5.24759200  | -0.18601000 | 2.79503200  |
| C  | 4.64437300  | -0.06203600 | 0.72141000  |
| C  | 3.53720600  | -0.16995400 | -0.16993700 |
| C  | -2.33967600 | -1.95244400 | 0.18764100  |
| C  | -2.12123000 | -2.94383500 | -0.77317200 |
| C  | -3.06630100 | -3.20293100 | -1.75634900 |
| H  | -2.88087800 | -3.97952900 | -2.49301900 |
| C  | -4.25517900 | -2.47738200 | -1.78786900 |
| C  | -4.49081600 | -1.48868800 | -0.84180300 |
| H  | -5.40766200 | -0.90313500 | -0.86579100 |
| C  | -3.53807300 | -1.24046100 | 0.13766300  |
| H  | 0.20634400  | 1.06129200  | 0.19375800  |
| C  | 3.78501000  | -0.03833900 | -1.55662900 |
| C  | 5.05154400  | 0.22253600  | -2.02060800 |
| C  | 6.13552700  | 0.37575100  | -1.13155600 |



|   |             |             |             |
|---|-------------|-------------|-------------|
| C | 5.93221100  | 0.22942600  | 0.21658100  |
| H | 2.96757500  | -0.17681500 | -2.25491700 |
| H | 5.21957400  | 0.30571300  | -3.09119000 |
| H | 7.12714200  | 0.59328400  | -1.51846800 |
| H | 6.75571300  | 0.31945300  | 0.92198000  |
| H | -4.99994200 | -2.67773200 | -2.55272500 |
| H | -1.19835000 | -3.51832200 | -0.73017600 |
| N | -3.77962100 | -0.12684900 | 1.04271600  |
| H | -3.03650200 | -0.02728500 | 1.73819900  |
| H | -4.65484000 | -0.24094900 | 1.55901900  |
| C | -2.70789700 | 3.28934600  | 1.42952200  |
| C | -1.63849400 | 4.06011100  | 1.87324900  |
| C | -0.66368500 | 4.49206600  | 0.97665700  |
| C | -0.76715600 | 4.15364400  | -0.36942100 |
| C | -1.83822400 | 3.39011000  | -0.82290900 |
| C | -2.80800100 | 2.95919900  | 0.07846500  |
| H | -3.47226100 | 2.94976700  | 2.12745000  |
| H | -1.56702300 | 4.32155200  | 2.92609900  |
| H | 0.17257000  | 5.09173300  | 1.32673500  |
| H | -0.00939100 | 4.48186200  | -1.07668400 |
| H | -1.91805300 | 3.12193000  | -1.87483400 |
| N | -3.89293400 | 2.11759700  | -0.34600400 |
| H | -3.85462200 | 0.86823900  | 0.43433600  |
| H | -4.79814700 | 2.55987100  | -0.19279900 |
| H | -3.81562700 | 1.88543000  | -1.33511400 |

**1d'**

|    |             |             |             |
|----|-------------|-------------|-------------|
| Mn | 0.11925500  | -0.71880300 | -0.55889900 |
| O  | -0.25766100 | -2.35820700 | 1.90877900  |
| O  | 1.54354900  | -2.76500400 | -2.10581900 |
| O  | -2.24444600 | -1.60475400 | -2.03044100 |
| N  | -0.67756300 | 1.12416800  | 0.02982700  |
| N  | 1.82463200  | 0.36538900  | 0.00167400  |
| C  | -0.10131600 | -1.66535000 | 0.99147100  |
| C  | 0.99311800  | -1.97982400 | -1.44974800 |
| C  | -1.32426800 | -1.28024700 | -1.37996900 |
| C  | -1.97239900 | 1.45167200  | 0.20761400  |
| C  | -2.41209100 | 2.77352900  | 0.17193600  |
| H  | -3.46313800 | 2.99377900  | 0.34205100  |

|   |             |             |             |
|---|-------------|-------------|-------------|
| C | -1.49005700 | 3.79079400  | -0.03399600 |
| H | -1.80918100 | 4.82722000  | -0.08293100 |
| C | -0.14823200 | 3.46171200  | -0.12329600 |
| H | 0.59402800  | 4.24380600  | -0.23645100 |
| C | 0.23124800  | 2.12185800  | -0.06560200 |
| C | 1.63377000  | 1.68568400  | -0.04158100 |
| C | 2.69619500  | 2.61319500  | -0.00281000 |
| H | 2.50066000  | 3.67790000  | -0.05788800 |
| C | 3.97928500  | 2.15424100  | 0.10258000  |
| H | 4.82040100  | 2.84368700  | 0.11540200  |
| C | 4.21499900  | 0.77076300  | 0.23495100  |
| C | 3.09583000  | -0.11199300 | 0.20179100  |
| C | -2.94026300 | 0.38376300  | 0.56862400  |
| C | -2.83195000 | -0.21643800 | 1.82602700  |
| C | -3.74968000 | -1.16966000 | 2.24585800  |
| H | -3.64256400 | -1.62382900 | 3.22673600  |
| C | -4.80731300 | -1.53533400 | 1.41798300  |
| C | -4.94092200 | -0.94924300 | 0.16549100  |
| H | -5.75297700 | -1.23570000 | -0.49847200 |
| C | -4.01539100 | 0.00305900  | -0.23170000 |
| H | 0.30416600  | 0.02235400  | -1.95656800 |
| C | 3.32542100  | -1.49104700 | 0.41816400  |
| C | 4.59898400  | -1.96490700 | 0.61707500  |
| C | 5.70947900  | -1.09463500 | 0.60320100  |
| C | 5.51657700  | 0.25054500  | 0.42127600  |
| H | 2.47868800  | -2.16757800 | 0.45618000  |
| H | 4.75127900  | -3.02629000 | 0.79433600  |
| H | 6.70974300  | -1.49180300 | 0.75153600  |
| H | 6.35470700  | 0.94424200  | 0.42956400  |
| H | -5.53011400 | -2.27741000 | 1.74314600  |
| H | -2.01233600 | 0.08184500  | 2.47585800  |
| N | -4.11553100 | 0.51851100  | -1.60631700 |
| H | -3.71309300 | 1.45606100  | -1.71043500 |
| H | -5.08760700 | 0.56986100  | -1.92462700 |
| H | -3.60249300 | -0.11365800 | -2.24344600 |

**TS<sub>1d'</sub>/1d**

|    |             |             |             |
|----|-------------|-------------|-------------|
| Mn | 0.08192900  | -0.78617700 | -0.27324000 |
| O  | -0.00238900 | -1.86785000 | 2.50652500  |

|   |             |             |             |
|---|-------------|-------------|-------------|
| O | 1.42894000  | -2.98184200 | -1.66970500 |
| O | -2.23367800 | -2.40051100 | -1.05839400 |
| N | -0.68871300 | 1.12097700  | 0.09799200  |
| N | 1.83183000  | 0.35522900  | 0.01062900  |
| C | 0.04638700  | -1.40625300 | 1.44348800  |
| C | 0.92382700  | -2.12970800 | -1.06076000 |
| C | -1.36761800 | -1.70036000 | -0.71307100 |
| C | -1.97176800 | 1.47953600  | 0.29647100  |
| C | -2.37221400 | 2.80910900  | 0.41034900  |
| H | -3.42278900 | 3.03208900  | 0.57682000  |
| C | -1.42477900 | 3.81653500  | 0.31417400  |
| H | -1.70894700 | 4.86079600  | 0.39809800  |
| C | -0.10332600 | 3.45624000  | 0.12000200  |
| H | 0.66079600  | 4.22260400  | 0.06181000  |
| C | 0.23714000  | 2.10828700  | 0.02082500  |
| C | 1.63100000  | 1.66749400  | -0.10516400 |
| C | 2.68419200  | 2.58819300  | -0.29991800 |
| H | 2.47580000  | 3.64155200  | -0.44692800 |
| C | 3.97131100  | 2.13211000  | -0.33173400 |
| H | 4.80144800  | 2.81207000  | -0.50929400 |
| C | 4.23125300  | 0.76742000  | -0.09106700 |
| C | 3.12264100  | -0.10699500 | 0.10518200  |
| C | -3.03387800 | 0.44465800  | 0.38256800  |
| C | -3.36245300 | -0.15232000 | 1.59884800  |
| C | -4.42901100 | -1.04138300 | 1.68301900  |
| H | -4.67035900 | -1.50232500 | 2.63652400  |
| C | -5.19515600 | -1.32941400 | 0.55799200  |
| C | -4.88424900 | -0.74578200 | -0.66553900 |
| H | -5.46225100 | -0.97984000 | -1.55599900 |
| C | -3.81234700 | 0.12605500  | -0.72756800 |
| H | 0.10421100  | -0.26670300 | -1.79186600 |
| C | 3.38930600  | -1.45385300 | 0.44621400  |
| C | 4.68176000  | -1.91029100 | 0.53650500  |
| C | 5.77497600  | -1.05583100 | 0.28362700  |
| C | 5.54976200  | 0.26272700  | -0.01795200 |
| H | 2.56153000  | -2.11642900 | 0.67272000  |
| H | 4.86278700  | -2.94500600 | 0.81545300  |
| H | 6.78903800  | -1.44037800 | 0.34746400  |
| H | 6.37636300  | 0.94906400  | -0.18954800 |
| H | -6.03410800 | -2.01521900 | 0.62624300  |
| H | -2.77326500 | 0.09231200  | 2.47996500  |
| N | -3.41844000 | 0.68089300  | -2.03697500 |
| H | -3.51767700 | 1.70167800  | -2.08403800 |

|   |             |            |             |
|---|-------------|------------|-------------|
| H | -3.99014600 | 0.29240300 | -2.79348800 |
| H | -2.43691500 | 0.46063100 | -2.26080000 |

**1d**

|    |             |             |             |
|----|-------------|-------------|-------------|
| Mn | 0.04087900  | -0.80000100 | 0.50315600  |
| O  | 0.27731800  | 0.12843300  | 3.32378000  |
| O  | 1.32004300  | -3.33114300 | 1.25101600  |
| O  | -2.38151600 | -2.34835300 | 1.11607500  |
| N  | -0.77166000 | 1.09066600  | -0.03616600 |
| N  | 1.73391100  | 0.28840600  | -0.12690200 |
| C  | 0.19033900  | -0.20125200 | 2.21800100  |
| C  | 0.84575700  | -2.31733500 | 0.94059300  |
| C  | -1.46417300 | -1.68280200 | 0.86246800  |
| C  | -2.06759300 | 1.45593200  | -0.11663500 |
| C  | -2.46698700 | 2.78746500  | 0.01332100  |
| H  | -3.52071100 | 3.03600800  | -0.06870200 |
| C  | -1.51190300 | 3.76851000  | 0.21580700  |
| H  | -1.80057400 | 4.80839400  | 0.33360400  |
| C  | -0.17427900 | 3.40380800  | 0.22581900  |
| H  | 0.59090200  | 4.16170500  | 0.34737100  |
| C  | 0.16703700  | 2.06324900  | 0.07996200  |
| C  | 1.56285600  | 1.60656200  | -0.01404100 |
| C  | 2.63748700  | 2.52076900  | -0.04180500 |
| H  | 2.46201800  | 3.58394700  | 0.07271100  |
| C  | 3.90993600  | 2.04893400  | -0.20528000 |
| H  | 4.76150800  | 2.72551300  | -0.19968800 |
| C  | 4.11864500  | 0.67366900  | -0.43139600 |
| C  | 2.98532100  | -0.19139700 | -0.42234100 |
| C  | -3.10763000 | 0.44276900  | -0.40042600 |
| C  | -4.25271600 | 0.37875800  | 0.39779000  |
| C  | -5.26949000 | -0.52677300 | 0.12161700  |
| H  | -6.14306400 | -0.56772400 | 0.76565900  |
| C  | -5.16901400 | -1.37635900 | -0.97463500 |
| C  | -4.04994300 | -1.31552900 | -1.79801600 |
| H  | -3.96706400 | -1.96488200 | -2.66655200 |
| C  | -3.04394700 | -0.40910600 | -1.50811300 |
| H  | -1.01596800 | -0.73971900 | -1.83191300 |
| C  | 3.17638400  | -1.54727300 | -0.77420700 |

|   |             |             |             |
|---|-------------|-------------|-------------|
| C | 4.43320300  | -2.02487900 | -1.05477500 |
| C | 5.56316200  | -1.18199400 | -0.99344300 |
| C | 5.40373300  | 0.14731400  | -0.69760700 |
| H | 2.31044700  | -2.19124200 | -0.87139600 |
| H | 4.55627700  | -3.06642600 | -1.33987200 |
| H | 6.55008400  | -1.58389600 | -1.20481700 |
| H | 6.25451300  | 0.82517100  | -0.67949700 |
| H | -5.96191000 | -2.08385200 | -1.19767400 |
| H | -4.32721300 | 1.03802500  | 1.25960600  |
| H | -0.01481000 | -1.37350300 | -1.01604600 |
| N | -1.86766400 | -0.37202400 | -2.37390100 |
| H | -1.64549200 | 0.57159300  | -2.70414800 |
| H | -1.99691300 | -0.95816600 | -3.20168200 |

**TS<sub>1d/1e</sub>**

|    |             |             |             |
|----|-------------|-------------|-------------|
| Mn | 0.01474900  | -0.77417200 | 0.51294100  |
| O  | 0.38842000  | 0.20156400  | 3.29065900  |
| O  | 1.28188800  | -3.31655100 | 1.27162500  |
| O  | -2.42420000 | -2.20960400 | 1.33841800  |
| N  | -0.78048200 | 1.10151300  | -0.03680400 |
| N  | 1.71294200  | 0.28915000  | -0.13810400 |
| C  | 0.23871900  | -0.16482700 | 2.20569800  |
| C  | 0.81232300  | -2.30608100 | 0.95394100  |
| C  | -1.50568400 | -1.59938000 | 0.98382000  |
| C  | -2.07506300 | 1.45965300  | -0.15866600 |
| C  | -2.47240800 | 2.79629700  | -0.06397300 |
| H  | -3.52299600 | 3.04587600  | -0.17670700 |
| C  | -1.52053800 | 3.77932700  | 0.13832900  |
| H  | -1.81059600 | 4.82181700  | 0.22651800  |
| C  | -0.18135200 | 3.41672200  | 0.17996100  |
| H  | 0.58228500  | 4.17793200  | 0.29108700  |
| C  | 0.15944300  | 2.07423800  | 0.07041500  |
| C  | 1.55344200  | 1.60836500  | -0.01195900 |
| C  | 2.63735200  | 2.51027100  | -0.02285900 |
| H  | 2.47282700  | 3.57336500  | 0.10783300  |
| C  | 3.90519400  | 2.02545900  | -0.18972200 |
| H  | 4.76392500  | 2.69270800  | -0.17337300 |
| C  | 4.10082800  | 0.65106200  | -0.43162000 |
| C  | 2.95916500  | -0.20297400 | -0.43178900 |

|   |             |             |             |
|---|-------------|-------------|-------------|
| C | -3.09949700 | 0.43506100  | -0.44740500 |
| C | -4.27984200 | 0.40927900  | 0.30256000  |
| C | -5.27559500 | -0.52159800 | 0.04154800  |
| H | -6.17561800 | -0.53551500 | 0.64933800  |
| C | -5.11408000 | -1.43566400 | -0.99549500 |
| C | -3.96350900 | -1.40820200 | -1.77357200 |
| H | -3.83896900 | -2.10668100 | -2.59831000 |
| C | -2.97009400 | -0.47352500 | -1.50880100 |
| H | -0.82076700 | -0.92070300 | -1.58044100 |
| C | 3.13618800  | -1.55842700 | -0.79180100 |
| C | 4.38845500  | -2.04626100 | -1.07506800 |
| C | 5.52637500  | -1.21452200 | -1.00841600 |
| C | 5.38057000  | 0.11397000  | -0.70202100 |
| H | 2.26593100  | -2.19633200 | -0.89381800 |
| H | 4.50157500  | -3.08708800 | -1.36651000 |
| H | 6.50910100  | -1.62465000 | -1.22312400 |
| H | 6.23824600  | 0.78275800  | -0.67797300 |
| H | -5.88844300 | -2.16702800 | -1.20836000 |
| H | -4.39515500 | 1.11579500  | 1.12173100  |
| H | -0.04410900 | -1.36699500 | -1.03817300 |
| N | -1.77048200 | -0.48878600 | -2.30003600 |
| H | -1.48742500 | 0.43617400  | -2.62688000 |
| H | -1.86359500 | -1.09301200 | -3.11599400 |

**1e**

|    |             |             |             |
|----|-------------|-------------|-------------|
| Mn | -0.16690000 | -0.65333800 | 0.59530500  |
| O  | 0.97299800  | 0.16739800  | 3.19406500  |
| O  | 0.88349900  | -3.38808600 | 0.98214700  |
| O  | -2.55232100 | -1.56888900 | 2.07332600  |
| N  | -0.84447600 | 1.21917000  | 0.07074500  |
| N  | 1.55205300  | 0.33741800  | -0.23400500 |
| C  | 0.52145100  | -0.15832300 | 2.18298000  |
| C  | 0.49675800  | -2.31118400 | 0.81862100  |
| C  | -1.63538100 | -1.20983200 | 1.46856900  |
| C  | -2.10744000 | 1.51566700  | -0.27988300 |
| C  | -2.49838500 | 2.84967200  | -0.42990500 |
| H  | -3.51597600 | 3.08597300  | -0.72464000 |
| C  | -1.56228700 | 3.85502000  | -0.24845400 |
| H  | -1.85374600 | 4.89651300  | -0.34548000 |

|   |             |             |             |
|---|-------------|-------------|-------------|
| C | -0.22820700 | 3.52143600  | -0.03385100 |
| H | 0.53566000  | 4.29132500  | -0.00752100 |
| C | 0.10339500  | 2.17853100  | 0.08048000  |
| C | 1.47626500  | 1.65144900  | 0.01567600  |
| C | 2.60988200  | 2.47848800  | 0.11209400  |
| H | 2.50025800  | 3.53001300  | 0.35558700  |
| C | 3.84905200  | 1.92717000  | -0.08276900 |
| H | 4.74846500  | 2.53161200  | 0.01064500  |
| C | 3.96376100  | 0.56895300  | -0.44231600 |
| C | 2.77185300  | -0.20870500 | -0.52798700 |
| C | -3.00234200 | 0.39073400  | -0.59557400 |
| C | -4.37916400 | 0.48884900  | -0.38185700 |
| C | -5.23079900 | -0.56628900 | -0.68240200 |
| H | -6.29564000 | -0.47579100 | -0.48919700 |
| C | -4.71004600 | -1.73580500 | -1.22415000 |
| C | -3.34337000 | -1.84844100 | -1.46154600 |
| H | -2.93535600 | -2.76312900 | -1.88730700 |
| C | -2.48754300 | -0.80134400 | -1.14687700 |
| C | 2.86586900  | -1.54714600 | -0.97166800 |
| C | 4.08919500  | -2.09578300 | -1.26737100 |
| C | 5.27521100  | -1.34158600 | -1.13186800 |
| C | 5.21098700  | -0.03088200 | -0.73406700 |
| H | 1.95619200  | -2.12125900 | -1.11685600 |
| H | 4.14398400  | -3.12186400 | -1.62081200 |
| H | 6.23347200  | -1.79882500 | -1.36131300 |
| H | 6.11038200  | 0.57490500  | -0.64818900 |
| H | -5.36523700 | -2.56830800 | -1.46517700 |
| H | -4.78242500 | 1.39681000  | 0.06088900  |
| N | -1.06438200 | -0.98985200 | -1.29660200 |
| H | -0.65157200 | -0.29727300 | -1.92386900 |
| H | -0.88403700 | -1.90168600 | -1.71188600 |

**1f**

|    |             |             |             |
|----|-------------|-------------|-------------|
| Mn | -0.15071900 | -0.62196500 | 0.65643100  |
| O  | 0.99827200  | 0.31717200  | 3.19678600  |
| O  | 0.90247500  | -3.33334800 | 1.17121300  |
| O  | -2.55801700 | -1.49856400 | 2.12351200  |
| N  | -0.85367100 | 1.20750700  | 0.07699300  |
| N  | 1.52006400  | 0.31436900  | -0.21202600 |

|   |             |             |             |
|---|-------------|-------------|-------------|
| C | 0.53153700  | -0.06034200 | 2.20613900  |
| C | 0.52185700  | -2.26114200 | 0.94356100  |
| C | -1.63169000 | -1.15555000 | 1.51523400  |
| C | -2.11850000 | 1.49543700  | -0.30635400 |
| C | -2.53242000 | 2.80942100  | -0.45832300 |
| H | -3.53912400 | 3.03124300  | -0.79892500 |
| C | -1.60559100 | 3.84366200  | -0.22406000 |
| H | -1.92099200 | 4.88102900  | -0.29853400 |
| C | -0.28278500 | 3.53965500  | 0.00418300  |
| H | 0.46063200  | 4.32887900  | 0.07746600  |
| C | 0.10797200  | 2.18641000  | 0.06429600  |
| C | 1.43697700  | 1.68012600  | -0.02684200 |
| C | 2.59459100  | 2.49315400  | 0.00787000  |
| H | 2.49207200  | 3.55716100  | 0.20731600  |
| C | 3.82469000  | 1.94247700  | -0.19786400 |
| H | 4.72735300  | 2.54912300  | -0.16076500 |
| C | 3.93346300  | 0.55154600  | -0.51601700 |
| C | 2.73916000  | -0.23058000 | -0.53109400 |
| C | -2.98617100 | 0.35097300  | -0.64374400 |
| C | -4.37088900 | 0.42325200  | -0.47178000 |
| C | -5.19932700 | -0.64683500 | -0.78554100 |
| H | -6.27130000 | -0.56839700 | -0.62656500 |
| C | -4.64585000 | -1.81777700 | -1.29174600 |
| C | -3.27069700 | -1.90976900 | -1.48211200 |
| H | -2.83339500 | -2.82477300 | -1.87852100 |
| C | -2.43895300 | -0.84277300 | -1.16190500 |
| C | 2.84119800  | -1.57916900 | -0.93023200 |
| C | 4.06584900  | -2.14581800 | -1.23980200 |
| C | 5.24056200  | -1.38800800 | -1.17667900 |
| C | 5.16228500  | -0.05023000 | -0.82730500 |
| H | 1.93138100  | -2.16547700 | -1.02575100 |
| H | 4.10758100  | -3.18811200 | -1.54848300 |
| H | 6.19965800  | -1.83928200 | -1.41758200 |
| H | 6.05959300  | 0.56709100  | -0.79688200 |
| H | -5.28016200 | -2.66472600 | -1.53956100 |
| H | -4.79877600 | 1.33032900  | -0.05025100 |
| N | -1.01463500 | -1.01823600 | -1.26295000 |
| H | -0.57160200 | -0.30054000 | -1.83667500 |
| H | -0.80267700 | -1.92070800 | -1.68256700 |



**1g**

|    |             |             |             |
|----|-------------|-------------|-------------|
| Mn | 0.03890400  | -0.69034700 | 0.55596200  |
| O  | 1.49213800  | -2.12968100 | 2.70274400  |
| O  | 0.03795800  | -2.98721600 | -1.34230200 |
| O  | -2.35526500 | -1.85854600 | 1.82137300  |
| N  | -0.78388300 | 1.18019900  | 0.06582300  |
| N  | 1.73251500  | 0.37303200  | 0.01282200  |
| C  | 0.92490400  | -1.55077100 | 1.86794600  |
| C  | 0.04472200  | -2.04559400 | -0.64876600 |
| C  | -1.43753900 | -1.36025600 | 1.30193700  |
| C  | -2.08621200 | 1.55208200  | 0.03211500  |
| C  | -2.47892800 | 2.87426100  | 0.21717400  |
| H  | -3.53387700 | 3.12768400  | 0.17422100  |
| C  | -1.51397100 | 3.84794900  | 0.43162800  |
| H  | -1.79873300 | 4.88204300  | 0.59933700  |
| C  | -0.17827900 | 3.48465600  | 0.38987500  |
| H  | 0.59204400  | 4.23469400  | 0.52838700  |
| C  | 0.15913900  | 2.14949600  | 0.17990900  |
| C  | 1.54898200  | 1.69662100  | 0.03897300  |
| C  | 2.60416200  | 2.62063200  | -0.11809900 |
| H  | 2.40914300  | 3.68660400  | -0.09935800 |
| C  | 3.87309300  | 2.15661000  | -0.31817000 |
| H  | 4.70605400  | 2.84442700  | -0.44446800 |
| C  | 4.10647900  | 0.76708800  | -0.38007000 |
| C  | 3.00097900  | -0.11563000 | -0.20948300 |
| C  | -3.11991600 | 0.53155900  | -0.24585200 |
| C  | -4.24269900 | 0.43042600  | 0.57759600  |
| C  | -5.22832600 | -0.51890200 | 0.33363500  |
| H  | -6.08462200 | -0.58694500 | 0.99818400  |
| C  | -5.11505800 | -1.38323100 | -0.74862700 |
| C  | -4.01929700 | -1.28565400 | -1.60158400 |
| H  | -3.93013700 | -1.94023100 | -2.46544400 |
| C  | -3.05190800 | -0.33128600 | -1.34416100 |
| C  | 3.24026700  | -1.50652100 | -0.28303600 |
| C  | 4.50682500  | -1.98717300 | -0.51427100 |
| C  | 5.60002100  | -1.11175000 | -0.67679500 |
| C  | 5.39890500  | 0.24311500  | -0.61044000 |
| H  | 2.40943300  | -2.19233200 | -0.16259000 |
| H  | 4.66593200  | -3.06074800 | -0.57234900 |
| H  | 6.59378100  | -1.51290100 | -0.85492900 |
| H  | 6.22454700  | 0.94048500  | -0.73552400 |
| H  | -5.87974800 | -2.12952400 | -0.94088400 |
| H  | -4.31981200 | 1.08823100  | 1.44021300  |

|   |             |             |             |
|---|-------------|-------------|-------------|
| N | -1.91719700 | -0.22018600 | -2.27105100 |
| H | -1.02077800 | -0.33665700 | -1.75164700 |
| H | -1.95401600 | -0.94433500 | -2.99400300 |
| H | -1.88856700 | 0.68405000  | -2.75448500 |
